# Gender differences in the effects of cardiovascular drugs

J. Tamargo<sup>1,2\*</sup>, G. Rosano<sup>3,4</sup>, T. Walther<sup>5</sup>, J. Duarte<sup>2,6</sup>, A. Niessner<sup>7</sup>, J.C. Kaski<sup>8</sup>, C. Ceconi<sup>9</sup>, H. Drexel<sup>10</sup>, K. Kjeldsen<sup>11,12</sup>, G. Savarese<sup>13</sup>, C. Torp-Pedersen<sup>14</sup>, D. Atar<sup>15</sup>, B.S. Lewis<sup>16</sup>, and S. Agewall<sup>17</sup>

<sup>1</sup>Department of Pharmacology, School of Medicine, Universidad Complutense, 28040 Madrid, Spain; <sup>2</sup>CIBERCV, Madrid, Spain; <sup>3</sup>Cardiology Clinical Academic Group, St George's University Hospitals, NHS Foundation Trust, London SW17 0QT, Great Britain; <sup>4</sup>IRCCS San Raffaele Hospital, Department of Medical Sciences, Via Della Pisana 235, 00163 Rome, Italy; <sup>5</sup>Department of Pharmacology and Therapeutics, Western Gateway Building, University College Cork, Cork, Ireland; <sup>6</sup>Departamento de Farmacología, Facultad de Farmacia, Universidad de Granada, Granada 18071, Spain; <sup>7</sup>Division of Cardiology, Department of Internal Medicine II, Medical University of Vienna, Waehringer Guertel 18-20, A-1090 Vienna, Austria; <sup>8</sup>Cardiovascular Sciences Research Centre at St George's, University of London, Cranmer Terrace, London SW17 0RE, Great Britain; <sup>9</sup>University Hospital of Ferrara, U.O. Cardiologia, Post Degree School in Cardiology, Heart Failure and Cardiovascular Prevention Unit, Via Aldo Moro 8, 44124 Cona, Ferrara, Italy; <sup>10</sup>Department of Medicine and Cardiology, Academic Teaching Hospital and VIVIT Institute Carinagasse 47, 6800 Feldkirch, Austria; <sup>11</sup>Division of Cardiology, Department of Medicine, Copenhagen University Hospital (Holbaek Hospital), Holbaek, Denmark; <sup>12</sup>Department of Health Science and Technology, The Faculty of Medicine, Aalborg University, Aalborg, Denmark; <sup>13</sup>Division of Cardiology, Department of Medicine, Karolinska Institutet, Karolinska University Hospital, 171 76 Stockholm, Sweden; <sup>14</sup>Institute of Health Science and Technology, Aalborg University, Niels Jernes Vej 12, A5-208, 9220 Aalborg, Denmark; <sup>15</sup>Department of Cardiology B, Oslo University Hospital and Institute of Clinical Sciences, University of Oslo, Kirkeveien 166, N - 0407 Oslo, Norway; <sup>16</sup>Cardiovascular Clinical Research Institute, Lady Davis Carmel Medical Center, The Ruth and Bruce Rappaport School of Medicine, Technion-Israel Institute of Technology, Haifa, Israel; and <sup>17</sup>Oslo University Hospital Ullevål and Institute of Clinical Sciences, University of Oslo, Kirkeveien 166, N - 0407 Oslo, Norway

Received 28 September 2016; revised 14 November 2016; editorial decision 16 November 2016; accepted 5 December 2016; online publish-ahead-of-print 28 February 2017

Although sex-specific differences in cardiovascular medicine are well known, the exact influences of sex on the effect of cardiovascular drugs remain unclear. Women and men differ in body composition and physiology (hormonal influences during the menstrual cycle, menopause, and pregnancy) and they present differences in drug pharmacokinetics (absorption, distribution, metabolism, and excretion) and pharmacodynamics, so that is not rare that they may respond differently to cardiovascular drugs. Furthermore, women are also less often treated with evidence-based drugs thereby preventing optimization of therapeutics for women of all ages, experience more relevant adverse drug reactions than men, and remain underrepresented in most clinical trials. Thus, current guidelines for prevention, diagnosis, and medical treatment for cardiovascular diseases are based on trials conducted predominantly in middle-aged men. A better understanding of these sex-related differences is fundamental to improve the safety and efficacy of cardiovascular drugs and for developing proper individualized cardiovascular therapeutic strategies both in men and women. This review briefly summarizes gender differences in the pharmacokinetics and pharmacodynamics of cardiovascular drugs and provides recommendations to close the gaps in our understanding of sex-specific differences in drug efficacy and safety.

## Keywords

Pharmacokinetics • Pharmacodynamics • Sex • Gender • Cardiovascular drugs

## Introduction

Cardiovascular diseases (CVD) are the leading cause of morbidity and mortality in both sexes.<sup>1–6</sup> In the past, the risk of CVD was underestimated in women due to a misperception that females were protected against CVD.<sup>1–6</sup> Furthermore, women develop coronary artery disease (CAD) around 10 years later than men and at that time present a higher prevalence of cardiovascular risk factors, so they were more likely to be excluded from clinical trials.<sup>5–9</sup> Even nowadays CVD are commonly perceived to be a health problem only for men, leaving women with an inadequate prevention vulnerable to CVD. However, even when women during the fertile period have a lower risk of cardiovascular events, this protection decreases

after menopause, so that CVD is the major cause of death in women older than 65 years of age.<sup>1–10</sup> In Europe, CVD cause a greater proportion of deaths among women (51%) than men (42%) overall, i.e. they kill twice as many women as all forms of cancer combined.<sup>1,2</sup>

Men and women differ in the anatomy and physiology of the cardiovascular system (body composition, role of hormonal changes during menstrual cycle/pregnancy/menopause) and in risk factors, prevalence, symptoms, management, and outcomes of CVD.<sup>11–22</sup> There are also gender-related differences in the pharmacokinetics (PK) (i.e. the way drugs are absorbed, distributed, biotransformed, and excreted) and pharmacodynamics (PD) (the relationship between drug effect and drug concentration at the site of action) of some widely used cardiovascular drugs<sup>12,13</sup> (Figure 1). Thus, it would

\*Corresponding author. Tel/Fax: +34 91 3941472, Email: jtamargo@med.ucm.es

Published on behalf of the European Society of Cardiology. All rights reserved. © The Author 2017. For Permissions, please email: journals.permissions@oup.com.

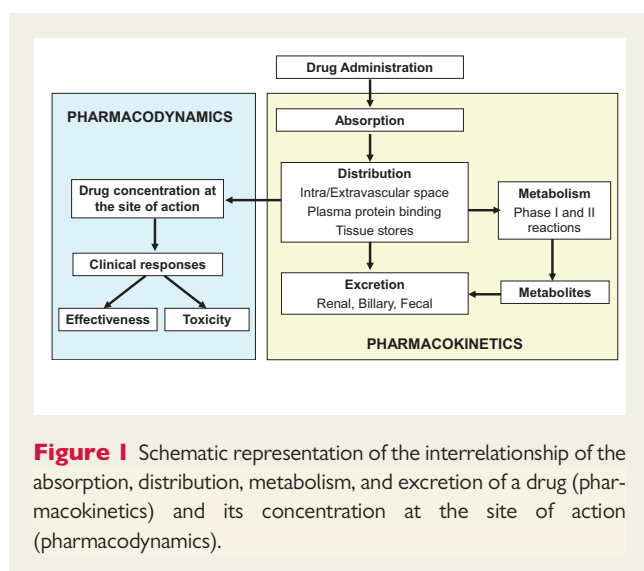

**Figure 1** Schematic representation of the interrelationship of the absorption, distribution, metabolism, and excretion of a drug (pharmacokinetics) and its concentration at the site of action (pharmacodynamics).

not be a surprise that efficacy and safety of these drugs can differ between men and woman.<sup>13–21</sup> However, the reported clinical relevance of these differences in PK/PD is moderate or remains uncertain, mainly because women are underrepresented in clinical trials.<sup>14</sup> Thus, current guidelines for CVD are based on studies conducted predominantly on middle-aged men. As expected, the lack of evidence on the gender difference in the efficacy and safety of cardiovascular therapeutic interventions leads to poor appropriateness. For these reasons, there has been growing attention of the European Society of Cardiology on the gender-related differences in the effects of cardiovascular drugs.<sup>1,2,4,13,20</sup> Taking into account these issues, the aims of this review are to summarize the effects of gender on PK/PD of cardiovascular drugs; to identify the scientific gaps that exist regarding to cardiovascular therapy in women; and to improve the treatment of CVD from a gender perspective. Throughout the text the terms 'sex', which is genetically determined, and 'gender', which refers to the socially constructed characteristics of women and men (such as norms, roles and relationships of and between groups of women and men), will be used as synonyms.

## Gender differences in pharmacokinetics

Sex-based differences in PK may arise from differences in body composition, drug absorption, plasma and tissue distribution, metabolizing enzymes and transporters, and drug excretion<sup>12–19,23–29</sup> (Table 1). Oral drug absorption is influenced by gastric pH, gastrointestinal transit times, blood flow and presystemic gut, and hepatic metabolism. Gastric acid secretion is lower and gastrointestinal transit times are slower in women, whereas gut metabolism does not consistently vary by sex.<sup>15–19,23–30</sup> A prolonged gastrointestinal transit can decrease the absorption of metoprolol or verapamil and drugs requiring an acidic environment for absorption may have lower oral bioavailability in women and they should wait longer after eating before taking drugs that should be administered on an empty stomach.<sup>27</sup> Formulations designed to be absorbed in the duodenum

(i.e. enteric-coated aspirin) may exhibit reduced/delayed absorption in women, particularly after a meal.<sup>31</sup> However, transdermal absorption is similar in both sexes.<sup>12,15,29</sup>

Drug distribution depends on body composition, plasma volume, organ blood flow, and tissue and plasma protein binding.<sup>15,18,24,25</sup> Sex hormones modulate drug plasma protein binding but limited data support that these gender differences significantly affect pharmacological effects. Women have higher percent of body fat and lower body weight, plasma volume and organ size, and blood flow. This explains the faster onset, higher volume of distribution ( $V_d$ ), and longer effects of lipophilic drugs (anaesthetics, benzodiazepines, neuromuscular blockers) (Table 2), while the  $V_d$  of hydrophilic drugs is smaller, reaching higher peak plasma levels ( $C_{max}$ ) and greater effects as compared with men.<sup>15–18,24,25</sup> Therefore, drugs requiring loading-dosages [i.e. some antiarrhythmics (amiodarone, lidocaine, procainamide), digoxin, heparin, thrombolytics] can reach higher  $C_{max}$  and produce a higher risk of adverse drug reactions (ADRs) in women.<sup>27,29</sup> In patients with obesity or marked increases in extracellular volume (e.g. heart failure), differences in body composition may alter drug distribution.<sup>29,32</sup>

Drug elimination from the body occurs by two processes: biotransformation and excretion. Hepatic clearance is a function of cardiac output and liver blood flow, which are lower in women, and sex-based differences in drug-metabolizing enzymes and transporters (Table 1), which play a greater role in PK variability than any of the other parameter.<sup>15–19,23–25,33–39</sup> CYP3A and the transporter P-glycoprotein (P-gp) present appreciable substrate overlap so that the increased clearance of CYP3A4 substrates in women might be the result of their lower hepatic P-gp activity.<sup>12,15,17,35–39</sup> Renal clearance depends on glomerular filtration rate (GFR) and tubular secretion and reabsorption. GFR is 10–25% lower in women, mostly older women, and drugs primarily excreted unchanged in the urine are cleared more slowly in women, but sex-related differences in renal excretion disappear after normalization for body weight or GFR.<sup>12,17,18,26,40</sup>

Differences in body composition and PK parameters may affect drug disposition leading to differences in drug efficacy and safety. However, only a few sex-based differences in PKs may lead to clinically relevant changes in drug efficacy or safety as most of the differences disappear after adjusting drug dosages for total body weight/size or GFR.<sup>29</sup> Sex-based differences in PK and weight-dosing recommendations may be warranted for drugs with a narrow therapeutic margin (e.g. antiarrhythmics, digoxin, anticoagulants, antithrombotics, and thrombolytics) to avoid an increase in the incidence of ADRs.<sup>12,15–21,23–26</sup>

## Gender differences in pharmacodynamics

Prospective and mainly retrospective analysis of clinical trials revealed sex-related differences in the efficacy and safety of several widely used cardiovascular drugs (Tables 3 and 4).<sup>1,12,15–20,23–29,41</sup> PD differences have not been studied as extensively as the PK differences and can be difficult to quantify as women are often underrepresented in trials and differences can be partly modulated by sex hormones [e.g. oral contraceptives (OCs) and hormone replacement therapy (HRT)].<sup>41</sup> This explains why differences in clinical outcomes are still uncertain for some

**Table 1** Gender differences in absorption, distribution, metabolism, and excretion

| Parameter                                                                                                  | Sex differences                                                                                                                                                                                                                                                               |
|------------------------------------------------------------------------------------------------------------|-------------------------------------------------------------------------------------------------------------------------------------------------------------------------------------------------------------------------------------------------------------------------------|
| Drug bioavailability                                                                                       |                                                                                                                                                                                                                                                                               |
| Absorption                                                                                                 | M > W                                                                                                                                                                                                                                                                         |
| Gastric acid secretion                                                                                     | M > W > P. Decreases absorption of weak acids but increases absorption of weak bases in M                                                                                                                                                                                     |
| Gastric emptying                                                                                           | M > W > P. E inhibit gastric emptying                                                                                                                                                                                                                                         |
| Gastrointestinal transit times                                                                             |                                                                                                                                                                                                                                                                               |
| Gut metabolism                                                                                             | M = W                                                                                                                                                                                                                                                                         |
| Body composition                                                                                           |                                                                                                                                                                                                                                                                               |
| Body surface area                                                                                          | M > P > W. Absorption increases when body surface is larger                                                                                                                                                                                                                   |
| Organ (heart) size                                                                                         | M > W                                                                                                                                                                                                                                                                         |
| Organ blood flow                                                                                           | Greater blood flow to skeletal muscle and liver in M; greater to adipose tissue in W. Blood flow increases during P                                                                                                                                                           |
| Total body water                                                                                           | M > P > W                                                                                                                                                                                                                                                                     |
| Plasma volume                                                                                              | P > M > W. Varies during the menstrual cycle and P                                                                                                                                                                                                                            |
| Body fat content                                                                                           | W > M                                                                                                                                                                                                                                                                         |
| Cardiac output                                                                                             | M > P > W. Increase rate of distribution in M                                                                                                                                                                                                                                 |
| Pulmonary function                                                                                         | M > P > W. Increase pulmonary elimination in M                                                                                                                                                                                                                                |
| Drug distribution                                                                                          |                                                                                                                                                                                                                                                                               |
| Volume of distribution                                                                                     | W > M. Higher Vd for lipophilic drugs in W<br>M > W. Higher Vd for hydrophilic drugs in M                                                                                                                                                                                     |
| Plasma protein binding to                                                                                  |                                                                                                                                                                                                                                                                               |
| Albumin                                                                                                    | M = W. P and OCP reduce plasma albumin and increases free drug plasma levels                                                                                                                                                                                                  |
| $\alpha$ 1-acid glycoprotein                                                                               | M > W. E, OC and P decrease its plasma levels                                                                                                                                                                                                                                 |
| Globulins                                                                                                  | E increase sex-hormone binding, corticosteroid-binding and thyroxine-binding globulins                                                                                                                                                                                        |
| Drug transporters                                                                                          |                                                                                                                                                                                                                                                                               |
| Hepatic P-glycoprotein                                                                                     | M > W                                                                                                                                                                                                                                                                         |
| OCT2                                                                                                       | M > W. E downregulates OCT2                                                                                                                                                                                                                                                   |
| OATP1B1-3                                                                                                  | M > W                                                                                                                                                                                                                                                                         |
| Drug metabolizing enzymes and transporters                                                                 |                                                                                                                                                                                                                                                                               |
| Phase I metabolic reactions (hydrolysis, oxidation, reduction) mediated via cytochrome P450 (CYP) isoforms | CYP1A2: M > W. Decreased in pregnancy and by OCP<br>CYP2B6: W > M<br>CYP2C9: M = W<br>CYP2C19: M = W<br>Decreases in pregnancy and by OCP<br>CYP3A4: W > M. Increases by OCP<br>CYP2D6: M > W. E induces and OCP decreases CYP2D6 activity<br>CYP2E1: M > W. Increases by OCP |
| Phase II metabolism                                                                                        |                                                                                                                                                                                                                                                                               |
| Uridine diphosphate glucuronosyltransferases (UGTs 1/2)                                                    | M > W. Increase by OCP and E and during pregnancy                                                                                                                                                                                                                             |
| N-Acetyltransferases                                                                                       | M = W                                                                                                                                                                                                                                                                         |
| Catechol-O-methyltransferase                                                                               | M > W                                                                                                                                                                                                                                                                         |
| Acetyl-/Butyryl-cholinesterase                                                                             | M > W                                                                                                                                                                                                                                                                         |
| Xantine-oxidase                                                                                            | W > M                                                                                                                                                                                                                                                                         |
| Gastric alcohol dehydrogenase                                                                              | M > W. Higher alcohol plasma levels in W                                                                                                                                                                                                                                      |
| Drug excretion                                                                                             |                                                                                                                                                                                                                                                                               |
| Renal blood flow                                                                                           | M > W. Renal Cl increases during P                                                                                                                                                                                                                                            |
| Glomerular filtration rate                                                                                 | Drugs actively secreted by the kidney may show sex differences in renal excretion                                                                                                                                                                                             |
| Tubular secretion/reabsorption                                                                             |                                                                                                                                                                                                                                                                               |

References are presented in Supplementary material online, Table S1.

Cl, clearance; E, oestrogens; GFR, glomerular filtration rate; GI, gastrointestinal; M, men; OCP, oral contraceptives; OATP, organic anion-transporter polypeptide; OCT, organic cationic transporter; P, pregnancy; P-gp, P-glycoprotein; Vd, volume of distribution; W, women.

cardiovascular drugs routinely used in clinical practice. Next, we shall review several sex-related PD differences.

## Antithrombotic drugs

Antithrombotic therapy, including anticoagulants and antiplatelet drugs, is the cornerstone for prevention and treatment of arterial thrombosis (e.g. myocardial infarction and stroke), venous

thromboembolic disorders, and the complications of atrial fibrillation (AF).<sup>42</sup> Women with acute coronary syndromes (ACS) have a higher risk of major bleedings than men, probably due to their smaller body, older age, reduced creatinine clearance, higher prevalence of comorbidities (hypertension, diabetes, renal dysfunction), higher risk of antithrombotics overdosing, and, perhaps, differences in response to antithrombotics between women and men.<sup>42–45</sup>

**Table 2** Sex-related differences in drug pharmacokinetic parameters

| Drug class                                           | Outcomes in females                                                                                                                                                                                                                |
|------------------------------------------------------|------------------------------------------------------------------------------------------------------------------------------------------------------------------------------------------------------------------------------------|
| Anaesthetics: propofol                               | Plasma propofol levels decline more rapidly in W at the end of infusion                                                                                                                                                            |
| Alcohol                                              | Lower gastric alcohol dehydrogenase activity in W. Higher plasma concentrations in W as compared with M following an equivalent drink                                                                                              |
| Antidepressants                                      | Higher AUC and $C_{max}$ in W                                                                                                                                                                                                      |
| H1-antihistamines                                    | Slower metabolism and elimination in W                                                                                                                                                                                             |
| Antipsychotic drugs <sup>a</sup>                     | Higher plasma levels and Vd and lower Cl in W. Reduce the dosage in W or increase dosage in M. Olanzapine is more rapidly eliminated in M than in W                                                                                |
| Aspirin                                              | Bioavailability and plasma levels of aspirin and salicylate are higher in W possibly due to lower activity of aspirin esterase, larger Vd and lower Cl in W than in M. Differences disappear with OCP                              |
| Benzodiazepines                                      | Lower initial plasma levels due to larger Vd, and possibly higher Cl, in W. OC reduce their Cl. Higher plasma levels of free diazepam in W                                                                                         |
| Beta-receptor agonists                               | W are less sensitive                                                                                                                                                                                                               |
| Beta blockers: metoprolol, propranolol               | W have higher plasma levels due to a smaller Vd and slower Cl. Drug exposure to metoprolol increases by OC                                                                                                                         |
| Calcium channel blockers                             | Renal Cl of atenolol and metoprolol increases during P due to enhanced hepatic metabolism<br>Faster Cl of verapamil, and nifedipine in W. Increased bioavailability and decreased clearance of oral verapamil in W compared with M |
| Digoxin                                              | W have higher serum digoxin concentrations due to reduced Vd and lower Cl. Drug Cl increases during P                                                                                                                              |
| Glucocorticoids                                      | Oral Cl and Vd of prednisolone are higher in M. Prednisolone clearance was reduced by OC                                                                                                                                           |
| Heparin                                              | W had higher plasma levels and APTT values than M due to a lower Cl                                                                                                                                                                |
| Iron                                                 | Oral absorption of iron is greater in W than in M                                                                                                                                                                                  |
| Isosorbide mononitrate                               | W had significantly higher serum plasma concentrations compared with men, probably due to the lower body weights in females                                                                                                        |
| Labetalol                                            | Labetalol concentrations are 80% higher in W                                                                                                                                                                                       |
| Lidocaine                                            | W has a larger Vd and may require a higher i.v. bolus dose than M. Higher free plasma levels in W receiving OCP, as alpha 1-acid glycoprotein levels are reduced by oestrogens                                                     |
| $\mu$ -opioid (OP3) receptor agonists <sup>b</sup>   | Slower onset and offset of action in W                                                                                                                                                                                             |
| Neuromuscular blocking drugs <sup>c</sup>            | Lower Vd, higher plasma levels, faster onset and prolonged duration in W due to the higher body fat and lower Vd                                                                                                                   |
| Paracetamol                                          | Lower plasma levels and higher Cl in M due to increased activity of the glucuronidation pathway. OCP increase drug clearance                                                                                                       |
| Procainamide                                         | Plasma levels are higher (30%) in W due to a lower BMI and Vd                                                                                                                                                                      |
| Quinidine                                            | Plasma protein binding decreases during P                                                                                                                                                                                          |
| Selective serotonin reuptake inhibitors <sup>d</sup> | W present higher plasma levels, probably related to sex-related activity of various CYP enzymes                                                                                                                                    |
| Statins                                              | Higher plasma levels of lovastatin and simvastatin in W                                                                                                                                                                            |
| Theophylline                                         | Metabolism is faster and half-life is shorter in W than in M. Plasma protein binding decreases and the Vd increases during P                                                                                                       |
| Torasemide                                           | Higher $C_{max}$ and lower Cl in W than in M                                                                                                                                                                                       |
| Tricyclic antidepressants                            | Free plasma concentrations of imipramine, clomipramine, and nortriptyline are higher during pregnancy                                                                                                                              |
| Verapamil                                            | W display faster Cl of verapamil after i.v. administration probably due to the higher activity of CYP3A4 or lower activity of P-gp; lower Cl in W after oral administration                                                        |
| Vorapaxar                                            | $C_{max}$ and AUC are 30% higher in women but no dose adjustment is required                                                                                                                                                       |
| Warfarin                                             | Higher free plasma levels in W                                                                                                                                                                                                     |
| Zolpidem                                             | Plasma levels and AUC are higher, and Cl is lower in W                                                                                                                                                                             |

References are presented in Supplementary material online, Table S2.

AUC, area under the curve; BMI, body mass index; Cl, clearance;  $C_{max}$ , peak plasma drug concentrations; CYP, cytochrome P450 isoforms; i.v., intravenous; M, men; OC, oral contraceptives; P, pregnancy; P-gp, P-glycoprotein; Vd, volume of distribution; W, women.

<sup>a</sup>Olanzapine, clozapine, pimozone, haloperidol.

<sup>b</sup>Fentanyl, morphine, pentazocine, ramifentanil.

<sup>c</sup>Atracurium, pancuronium, rocuronium, vecuronium.

<sup>d</sup>Citalopram, dapoxetine, escitalopram, fluoxetine, fluvoxamine, paroxetine, sertraline.

## Anticoagulants

### Indirect thrombin inhibitors

In men, unfractionated heparin (UFH) distributes into plasma volume, which is proportional to body weight, and is eliminated more rapidly; so, higher doses are required in heavy patients<sup>46,47</sup> Women treated with UFH for acute myocardial infarction (AMI) achieve higher activated partial thromboplastin time than men, a finding associated with

an increasing bleeding risk, even after weight-adjusted dosing.<sup>48</sup> The main suggested risk factors for bleeding included a smaller body size, older age, reduced creatinine clearance, higher prevalence of comorbidities, and an increased sensitivity to heparin.<sup>46,48,49</sup>

A *post hoc* analysis of the TIMI 11A study showed similar PK/PD profiles of enoxaparin in men and women with non-ST-segment elevation ACS (NSTEMI-ACS).<sup>50,51</sup> The meta-analysis of two large trials

**Table 3** Sex differences in drug pharmacodynamics

| Drug class                                                              | Outcomes                                                                                                                                                                     |
|-------------------------------------------------------------------------|------------------------------------------------------------------------------------------------------------------------------------------------------------------------------|
| Alcohol                                                                 | Higher vulnerability of W to acute and chronic complications of alcoholism                                                                                                   |
| Anaesthetics: propofol                                                  | W are less sensitive to propofol. W wake up faster and require higher doses than M for the same effect                                                                       |
| ACEIs                                                                   | No mortality benefit in W with asymptomatic LV systolic dysfunction                                                                                                          |
| Antidepressants                                                         | W respond better to selective serotonin/noradrenaline uptake inhibitors. M respond better to TCA and MAO inhibitors than W                                                   |
| Antipsychotic drugs                                                     | More effective in W. They require lower doses to control symptoms                                                                                                            |
| Aspirin                                                                 | Higher protective effect against stroke in W and against MI in M. Aspirin is more active in male platelets. Aspirin resistance is more frequent in W                         |
| Benzodiazepines                                                         | Diazepam impairs psychomotor skills to a greater extent in W. They should be initiated at lower dosages in W                                                                 |
| Beta blockers                                                           | Greater reduction in blood pressure and heart rate in W treated with metoprolol and propranolol                                                                              |
| Digoxin                                                                 | W with HF have an increased risk of mortality on digoxin therapy. W require lower doses and lower plasma levels (< 0.8 ng/mL)                                                |
| Glucocorticoids                                                         | Females are more sensitive to the effects of methylprednisolone                                                                                                              |
| Heparin                                                                 | W had increased partial thromboplastin time, even after weight-adjusted dosing, suggesting an increased sensitivity                                                          |
| Ibuprofen                                                               | Less effective in W                                                                                                                                                          |
| Lidocaine                                                               | W may require a higher i.v. bolus doses to achieve the same plasma levels                                                                                                    |
| $\mu$ -opioid (OP3) and $\kappa^*$ (OP2) receptor agonists <sup>a</sup> | W experience more pain and are more sensitive to opioid receptor agonists. M require 30–60% greater dose of morphine and $\kappa$ receptor agonists for the same pain relief |
| Neuromuscular blocking drugs <sup>b</sup>                               | W are more sensitive and require lower (20–30%) doses than M due to a smaller Vd. If a rapid onset of action is required the dose should be increased in M                   |
| Paracetamol                                                             | W displayed lower Cl and Vd compared with M. OCP increase drug Cl                                                                                                            |
| rt-PA                                                                   | W with acute ischaemic stroke obtain more benefit from rt-PA than M                                                                                                          |
| SSRIs <sup>c</sup>                                                      | W respond better than M, being the preferred therapy                                                                                                                         |
| Verapamil                                                               | Greater reduction in blood pressure and heart rate in W                                                                                                                      |
| Warfarin                                                                | W need less warfarin per week than M. Doses should be modified to reduce the risk of excessive anticoagulation in W                                                          |
| Zolpidem                                                                | The recommended initial dose is lower in W                                                                                                                                   |

References are presented in Supplementary material online, Table S3.

ACEIs, angiotensin-converting enzyme inhibitors; Cl, clearance; E, oestrogens; HF, heart failure; i.v., intravenous; LV, left ventricular; M, men; MAO, monoamine oxidase; MI, myocardial infarction; OCP, oral contraceptives; rt-PA, recombinant tissue plasminogen activator; SSRIs, selective serotonin reuptake inhibitors; TCA, tricyclic antidepressants; Vd, volume of distribution; W, women.

<sup>a</sup>Alfentanil, butorphanol\*, fentanyl, morphine, nalbuphine\* pentazocine\*, remifentanyl.

<sup>b</sup>Atracurium, pancuronium, rocuronium and vecuronium.

<sup>c</sup>Citalopram, dapoxetine, escitalopram, fluoxetine, fluvoxamine, paroxetine, sertraline.

\*refers to  $\kappa$  (OP2) receptor agonists.

(ESSENCE and TIMI 11B) reported that enoxaparin was more effective than intravenous (i.v.) dose-adjusted UFH in reducing the risk of death, MI, or recurrent angina prompting urgent revascularization, but the benefit was greater in women.<sup>52</sup> In the FRISC study, dalteparin reduced the risk of death and MI in patients with ACS, but women showed larger absolute and relative reduction of the primary endpoint compared with men.<sup>53</sup> However, minor bleeding was more frequent and anti-Xa activity during the acute phase treatment was higher in women.<sup>54</sup> The ExTRACT-TIMI 25 study randomized ST-segment elevation MI (STEMI) patients with planned fibrinolysis to enoxaparin or UFH. Women had a similar relative benefit and greater absolute benefit than men when treated with enoxaparin, despite they presented higher baseline risk and increased short term mortality.<sup>55</sup> In the SYNERGY study, enoxaparin was not superior but also non-inferior to UFH across multiple subgroups, including those stratified by sex, with a modest increase in the risk of major bleeding.<sup>56</sup>

#### Direct thrombin inhibitors

Clearance of argatroban is faster in women, but no sex-related differences in anticoagulant response were reported.<sup>57,58</sup> In the pooled

analysis of REPLACE-2, ACUITY, and HORIZONS-AMI trials men and women undergoing percutaneous coronary interventions (PCI) experience similar safety benefits of bivalirudin in reducing bleeding complications, but women experienced a more pronounced benefit of bivalirudin in reducing 12-month mortality than men.<sup>59,60</sup> In the ACUITY trial, no differences were observed in rates of 1-year composite ischaemia or mortality in women who received bivalirudin vs. heparin plus GPI.<sup>61</sup> Bleeding complications were higher in women, likely because of comorbidities, as they were older and had more diabetes, hypertension, and renal impairment.<sup>59,60,62–64</sup> In the REPLACE-2 trial, female gender was associated with higher rates of death and bleeding complications in univariate analyses, but multivariate analyses eliminated nearly all outcome differences between sexes.<sup>60,65,66</sup> Similar results were observed in another study.<sup>67</sup>

#### Parenteral anti-factor Xa inhibitors

In the OASIS-5 trial, fondaparinux and enoxaparin showed similar efficacy in reducing the composite endpoint (death, MI, or refractory ischaemia at 9 days) or major bleeding in men and women with



**Table 4** Examples of sex differences in adverse drug reactions

| Drug class                               | Outcomes in females                                                                                                         |
|------------------------------------------|-----------------------------------------------------------------------------------------------------------------------------|
| Analgasic drugs                          | W report more adverse effects to perioperative analgesic drugs                                                              |
| Anaphylactic shock                       | Anaphylactic shock induced by neuromuscular blocking agents, hypnotics, opioids and benzodiazepines is more frequent in W   |
| Anaesthetic drugs                        | W are more prone to ADR postoperatively                                                                                     |
| Angiotensin converting enzyme inhibitors | Dry cough is 2 to 3 times more frequent in W. No gender preference for angioedema/urticaria                                 |
| Anorectics                               | Cardiac valvulopathy is more frequent in W exposed to phentermine, dexfenfluramine, or fenfluramine                         |
| Antiarrhythmic drugs                     | Higher risk of QT prolongation and TdP in W                                                                                 |
| Anticoagulants                           | More frequent and severe bleedings in W                                                                                     |
| H1-Antihistamines                        | W are more vulnerable to sedation and drowsiness                                                                            |
| Antiplatelets                            | More frequent and severe bleedings in W                                                                                     |
| Antipsychotics                           | W present more extrapyramidal and anticholinergic effects and QTc prolongation. M reported more sexual problems             |
| Aspirin                                  | Increased risk of bleeding in W. More ulcer complications in M                                                              |
| Beta blockers                            | Enhanced BP lowering and heart rate reduction with metoprolol in W                                                          |
| Benzodiazepines                          | Diazepam impaired the psychomotor skills more in W than in M. Dependency is more frequent in W                              |
| Calcium channel blockers                 | Higher risk of oedema in W. Women taking OCP and diazepam during menstruation become relatively intoxicated                 |
| Digoxin                                  | Higher mortality in W with HF. Digoxin plasma levels < 0.8 ng/mL are recommended in W                                       |
| Diuretics                                | Higher rates of hospitalizations due to hypo-osmolarity, hypokalaemia and hyponatraemia and higher risk of arrhythmias in W |
| Drug-induced TdP                         | W have a longer QTc intervals and development of TdP more frequently than M                                                 |
| GPIIb/IIIa inhibitors                    | W experience more bleeding than M                                                                                           |
| Heparin                                  | W present higher bleeding risk                                                                                              |
| Opioid receptor agonists                 | W experience more ADRs (nausea and vomiting, respiratory depression) despite smaller dose requirements for pain control     |
| NSAIDs                                   | M display a higher prevalence of ADRs than W                                                                                |
| Paracetamol                              | Acute liver failure due to paracetamol overdose is more common in W                                                         |
| Procainamide                             | Systemic lupus erythematosus more common in W                                                                               |
| Skin diseases                            | W > M (systemic lupus erythematosus and photosensitivity)                                                                   |
| Statins                                  | Myopathy is more frequent in older W with low body weight                                                                   |
| Thiazides                                | More hyponatraemia and hypokalaemia in W                                                                                    |
| Thiazolidinediones                       | Double the risk of fractures among diabetic W, but not among M                                                              |
| Thrombolytics                            | Higher risk of bleeding and intracranial haemorrhagic in W                                                                  |
| Unfractionated heparin                   | W develop higher plasma levels and higher bleeding risk                                                                     |
| Zolpidem                                 | To reduce the risk of morning-after activity impairment decrease the dose of zolpidem by 50% in W                           |

References are presented in Supplementary material online, Table S4.

ACEIs, angiotensin-converting enzyme inhibitors; ADR, adverse drug reactions; BP, blood pressure; CV, cardiovascular; E, oestrogens; GP, glycoprotein; HF, heart failure; M, men; NSAIDs, non-steroidal anti-inflammatory drugs; OCP, oral contraceptives; QTc, corrected QT interval; TdP, torsades de pointes; W, women.

ACS.<sup>68</sup> In the OASIS-6 trial, fondaparinux reduced the primary composite endpoint (death or reinfarction at 30 days) with a non-significant trend towards fewer severe haemorrhages in men and women with STEMI treated with primary PCI, thrombolysis, or no reperfusion therapy.<sup>69,70</sup>

#### Oral anticoagulants

Warfarin is equally effective in reducing the risk of thromboembolism in men and women and did not pose a greater risk of major haemorrhagic complications in women.<sup>29,71–73</sup> In five randomized trials, warfarin consistently decreased (68%) the risk of stroke in patients with AF with virtually no increase in the frequency of major bleeding.<sup>74</sup> However, women had more minor bleeding complications than men<sup>75,76</sup> and they require less mg per week than men to maintain a therapeutic International Normalized Ratio (INR), older women requiring the lowest doses.<sup>73</sup> Thus, starting and maintenance doses should be modified to reduce the risk of inadequate therapy in young females, and excessive anticoagulation in elderly patients.<sup>77</sup> Surprisingly, there is little and contradictory information regarding

the possible interactions of OCs and HRT and oral anticoagulants. Thus, it is recommended frequent monitoring of INR when this combination is used.<sup>78</sup>

#### Novel anti-factor II and anti-factor X antagonists

Gender had no significant influence on the PK of rivaroxaban,<sup>79–81</sup> apixaban,<sup>82</sup> and edoxaban<sup>83</sup>. Dabigatran exposure is ~30% higher in females, but no sex-related interactions were observed.<sup>84–86</sup> Major phase three trials in patients with non-valvular AF (NVAf) recruited approximately 30–40% of women.<sup>84,87–90</sup> Dose adjustments were made according to weight and renal function in some trials, which implies some correction for smaller female patients. There were small trends towards reduction of stroke and systemic embolism for dabigatran 150 mg<sup>84</sup> and reduction of major bleedings for edoxaban 60 mg<sup>90</sup> and apixaban<sup>88</sup> in women compared with men. An analysis of RELY, ARISTOTLE, and ROCKET AF trials (17 336 women) showed that compared with warfarin, novel anti-factor II and anti-factor X antagonists (NOACs) reduced the event rate in both sexes, but women suffered significant lower bleeding rates with NOACs

compared with warfarin, while men had similar bleeding rates with both drugs. Thus, women appear to derive more benefits in terms of increased efficacy and improved safety from NOACs compared with men.<sup>91</sup> In a secondary analysis of the ARISTOTLE trial, women (35.3%) had a similar rate of stroke or systemic embolism, but among patients with previous history of stroke or transient ischaemic attack, women had a lower risk of recurrent stroke compared with men. Women also had a lower risk of all-cause death and cardiovascular death and a trend towards less major bleeding and major or non-major clinically relevant bleeding than men.<sup>92</sup>

In a meta-analysis of 13 studies (> 100 000 patients) NOACs appeared to have a similar efficacy and safety compared with vitamin K antagonists in females and males treated for NVAF and acute venous thromboembolism (VTE).<sup>93,94</sup> However, in another two meta-analysis women with acute VTE presented more bleeding complications than men when treated with NOACs, although all-cause mortality was not reported by sex in these patients.<sup>94–96</sup> Finally, in a meta-analysis of six trials women with NVAF treated with warfarin have a greater residual risk of cerebrovascular accidents/systemic embolisms (CVA/SE) and an equivalent major bleeding risk, whereas those treated with NOACs deemed superior to warfarin are at equivalent residual risk of CVA/SE and less major bleeding risk compared with men.<sup>97</sup> These results suggested an increased net benefit of NOACs compared with warfarin in treating women with AF.

### Antiplatelet drugs

Women have longer bleeding times, higher baseline platelet reactivity, and stronger spontaneous and adenosine diphosphate- or collagen-induced aggregation and their glycoprotein (GP) IIb/IIIa receptors are more prone to be activated by multiple stimuli as compared with men.<sup>42,98–104</sup> Differences in platelet reactivity may result from direct platelet effects of sex hormones or indirect effect on the vasculature. Oestrogens via oestrogen receptor  $\alpha$  decrease platelet aggregation and stimulate prostacyclin and NO synthesis and release from vascular endothelial cells<sup>105–107</sup> and decrease the levels of fibrinogen, antithrombin III, protein S, and plasminogen activator inhibitor 1.<sup>42,108</sup> Conversely, testosterone increases the production of thromboxane A<sub>2</sub> and the expression of TXA<sub>2</sub> receptors.<sup>42,109,110</sup> These changes may explain why platelets from premenopausal women are less prothrombotic than platelets from age-matched men, although post-menopausal HRT does not exert cardioprotective effects<sup>111,112</sup> and OCs increase the risk of thrombotic events.<sup>113</sup>

#### Acetylsalicylic acid

Low-dose aspirin has been the cornerstone of treatment for patients with various atherosclerotic disease manifestations.<sup>114,115</sup> Its antiplatelet effect is similar in both sexes when COX-1 direct pathways are considered, but pathways indirectly related to COX-1, i.e. those stimulated by collagen, adenosine diphosphate (ADP), and epinephrine are less inhibited in female subjects.<sup>116</sup> *In vitro*, aspirin produces a greater inhibition of platelet aggregation in men, while women retained a higher prevalence of 'aspirin resistance' because of increased baseline platelet reactivity.<sup>98,116–118</sup> In *ex vivo* platelet aggregation studies, aspirin was less effective at inhibiting platelet aggregation in women with a history of ischaemic stroke or transient

ischaemic attack.<sup>119</sup> Thus, inhibition of platelet aggregation in women treated with aspirin may be insufficient, and females might benefit from higher maintenance dosages or the use of alternative antiplatelet drugs. There are some potential explanations for these gender-specific differences, including (i) PK differences. Oral bioavailability, area under the plasma concentration–time curve (AUC), and elimination half-life of aspirin are significantly greater in women, probably because men conjugate more aspirin with glycine and glucuronic acid, while salicylic acid clearance is higher in males due to enhanced activity of the glycine conjugation pathway.<sup>116,120–122</sup> These differences in biotransformation disappear in women taking OCs.<sup>122</sup> (ii) The role of sex hormones. The inhibitory effect of aspirin is not affected by oestrogens,<sup>42,123</sup> but it is reduced in orchietomized males and restored by testosterone, which confirms its role in aspirin-mediated antiaggregant effects.<sup>123,124</sup> (iii) Sex-related differences in platelet and vascular functions and disease pathogenesis. Men with stable ischaemic heart disease are more likely to respond to mental stress increasing blood pressure (BP), while women exhibit higher platelet aggregation.<sup>125</sup>

In a primary prevention trial in 39 876 women, subgroup analyses showed that aspirin significantly reduced the risk of major cardiovascular events, ischaemic stroke, and MI only among women 65 years of age or older.<sup>126</sup> In a sex-specific meta-analysis of six primary prevention trials (51 342 women), aspirin reduced the risk of cardiovascular events in both sexes.<sup>127</sup> Women derived benefit from a reduction in the risk of ischaemic stroke, without an increase in haemorrhagic stroke or a significant effect on MI, cardiovascular, and all-cause mortality. In men, benefit derived from a reduction in MI, but there was no significant effect on stroke (haemorrhagic strokes increased), cardiovascular, and all-cause mortality. However, aspirin also increased the risk of major bleeding ( $\approx 70\%$ ) in both sexes; thus, the overall benefit and risk requires careful consideration by the physician and patient before initiating aspirin for primary prevention of CVD. In 14 trials enrolling 107 686 participants without pre-existing CVD low-dose aspirin reduced major cardiovascular events, MI, ischaemic stroke, and all-cause mortality, but increases haemorrhagic stroke and major bleedings in both sexes.<sup>128</sup> In subgroup analysis, aspirin use reduced MI among men and ischaemic stroke among women. Aspirin had no significant effect on CVD in the diabetic population, but reduced the risk of MI among diabetic men.<sup>128</sup>

The benefits of aspirin in secondary prevention trials are well documented in both sexes. The meta-analyses of 287 trials, comprising predominantly studies with aspirin, showed that aspirin reduces serious cardiovascular events (non-fatal MI, non-fatal stroke, or vascular deaths) by  $\approx 25\%$  in high-risk patients although the absolute risk reduction mainly depends on the individual's absolute risk without treatment.<sup>129</sup> In 23 trials ( $n = 113\ 494$  participants) aspirin reduced (27%) the risk of non-fatal, but not of fatal MI. Trials that recruited predominantly men demonstrated the largest risk reduction (38%), while trials that recruited predominately women failed to demonstrate any benefit.<sup>130</sup> Another meta-analyses compared long-term aspirin treatment on serious vascular events (MI, stroke, or vascular death) and major bleeds in 6 primary prevention trials (95 000 individuals at low-average risk) and 16 secondary prevention trials (17 000 individuals at high-average risk).<sup>115</sup> In primary prevention trials, aspirin produced a 12% reduction in serious vascular events, due to mainly a reduction of

about a fifth in non-fatal MI; the net effect on stroke and vascular mortality was not significant. In secondary prevention trials, aspirin yielded a greater absolute reduction in serious vascular events with a non-significant increase in haemorrhagic stroke but reductions of about a fifth in total stroke and in coronary events. In both primary and secondary prevention trials, the proportional reductions in the aggregate of all serious vascular events seemed similar for men and women. However, aspirin also increased ( $\approx 70\%$ ) the risk of major bleeding in both sexes to a similar degree. Thus, for secondary prevention, the net benefits aspirin substantially exceed the bleeding hazards, irrespective of age or sex, while the balance of beneficial effects and bleeding hazards in primary prevention was less clear.

#### *Glycoprotein IIb/IIIa inhibitors*

In a meta-analysis of 6 randomized trials in  $>31\,000$  patients with NST-ACS undergoing PCI, i.v. glycoprotein IIb/IIIa inhibitors (GPIs) reduced 30-day rate of death or MI at 30 days in males, but not in females,<sup>131</sup> apparently because a higher percentage of men with positive baseline troponins. Once patients were stratified according to troponin levels, there was no evidence of a sex difference in treatment response.<sup>131</sup> A pooled analysis from EPIC, EPILOG, and EPISTENT trials (6595 patients) found that women and men obtain equivalent short- and long-term benefit in clinical outcomes from abciximab during PCI.<sup>132</sup> In the ESPRIT trial, eptifibatid reduced to a similar extent the rates of death, MI, or urgent target vessel revascularization in both sexes.<sup>133</sup>

Women had higher rates of both major and minor bleeding after PCIs than men,<sup>131–134</sup> but after adjustment for weight, age, and comorbidities, differences in bleeding between men and women were non-significant. In the CRUSADE study, women with NSTEMI-ACS experienced more bleeding than men whether or not they were treated with GPIs. However, because of frequent excessive dosing in women,  $\sim 25\%$  of this excess bleeding risk is avoidable by appropriate dose adjustment.<sup>44</sup> In STEMI patients, early administration of abciximab use improved patency of the infarct-related artery before primary PCI and improved epicardial flow and reduced mortality after primary PCI in women.<sup>135</sup> The frequency of bleeding events was similar in both women and men.

#### *Adenosine diphosphate P2Y<sub>12</sub>receptor antagonists*

Although *ex-vivo* studies found that women are more often hyporesponsive to clopidogrel, there are no differences in the plasma levels of its active metabolite between sexes.<sup>12,136–138</sup> In a sex-specific meta-analysis of 5 randomized trials (79 613 patients, 30% women), clopidogrel reduced the risk of major cardiovascular events in both women and men.<sup>139</sup> In women, the overall effect of clopidogrel was driven by a reduction of MI; in men, by a significant reduction in MI, stroke, and all-cause mortality. Additionally, clopidogrel increased the risk of major bleeding in both men and women.

Another meta-analysis of 20 trials (233 285 participants) confirmed that cardiovascular risk (defined as MI, stroke, or cardiovascular death) reduction with clopidogrel did not significantly differ by gender. Results for other inhibitors were comparable, although available data were sparse.<sup>140</sup>

Systemic exposure of prasugrel and its active metabolite are not appreciably affected by gender.<sup>141,142</sup> In the TRITON-TIMI 38 study

which compared prasugrel with clopidogrel in patients with ACS and scheduled PCI unadjusted data showed a higher incidence of primary efficacy endpoints (cardiovascular death, nonfatal MI, or nonfatal stroke, individually and in combination) in women, but this difference disappeared after adjustment for baseline characteristics.<sup>143,144</sup> Similarly, in the PROMETHEUS study comparing outcomes in patients with ACS treated with clopidogrel and prasugrel, 1-year major adverse cardiac events (MACE) was significantly higher in women, but differences were no longer significant after adjustment for baseline risk.<sup>145</sup> In both trials, female gender was the strongest independent predictor of non-CABG-related serious bleeding, possibly due to some extent to lower body weight.<sup>144,145</sup>

Ticagrelor exposure was higher and its elimination half-life slightly longer in women, but dose adjustment is not required.<sup>146</sup> In a pre-specified analysis of the PLATO trial, female sex was not an independent risk factor for adverse clinical outcomes in moderate-to-high risk ACS patients and ticagrelor showed similar safety profile in men and women.<sup>147,148</sup> In a pre-specified subgroup analysis of the CHAMPION PHOENIX trial, cangrelor reduced the odds of major adverse cardiovascular events and stent thrombosis in women and men and appeared to offer greater net clinical benefit than clopidogrel.<sup>149</sup>

## Beta blockers

Oestrogens and progesterone inhibit the cardiac expression of  $\beta$ 1-adrenoceptors and reduce  $\beta$ -adrenergic-mediated stimulation exerting cardioprotective effects.<sup>150,151</sup> Thus, gender-specific differences in the PDs of  $\beta$ -blockers might be expected.

Women present higher  $C_{\max}$  and AUC to metoprolol and propranolol than men due to an enhanced absorption, lower  $V_d$ , and slower clearance via CYP2D6, leading to a greater reduction in heart rate and systolic BP during exercise.<sup>12,152–155</sup> Drug exposure to metoprolol is further increased by OCs,<sup>153,156</sup> while increased expression of CYP2D6 by testosterone can lead to faster drug clearance in men.<sup>12,153</sup> Surprisingly, metoprolol might exert a greater effect on stress-induced angina pectoris in men than in women in spite of higher plasma levels in females.<sup>157</sup>

Some trials found that  $\beta$ -blockers improved survival in males, but not in females, with hypertension<sup>152</sup> or CAD<sup>158</sup> or heart failure with reduced ejection fraction (HFrEF).<sup>159,160</sup> However, the *post hoc* analysis of several trials confirmed a similar and significant survival benefits of  $\beta$ -blockers (bisoprolol, carvedilol, metoprolol) on all-cause mortality/all-cause hospitalizations in women and men with HFrEF.<sup>161–164</sup> Similarly, pooling total mortality data by sex from MERIT-HF, CIBIS-II, and COPERNICUS showed similar and significant survival benefits in women and men with HFrEF.<sup>165</sup> In the BEST trial, the survival advantage was confined to women with non-ischaeamic aetiology, while in the ischaemic group, there was a trend for a better survival in men,<sup>166</sup> while the meta-analysis of 5 studies (CIBIS-II, COPERNICUS, MERIT-HF, BEST, and U.S. Carvedilol) recruiting 2134 women with HFrEF confirmed a similar reduction in mortality in both sexes.<sup>167</sup> These contrasting results were attributed to the fact that  $\beta$ -blockers were underused in females with MI, the underrepresentation of women in these trials ( $<25\%$ ), and women were older and sicker than the male cohort. In a recent meta-analysis of 11 trials enrolling 13 833 patients (24% women) with HFrEF in sinus rhythm  $\beta$ -blockers



reduced all-cause mortality and HF admissions for HF, irrespective of age or sex.<sup>168</sup> Thus,  $\beta$  blockers should not be withheld from women with HFrEF.

### Calcium channel blockers

Gender-specific PK differences have been described for verapamil<sup>169,170</sup> and nifedipine,<sup>171</sup> but not for amlodipine.<sup>172</sup> Women display faster clearance and lower plasma levels for nifedipine<sup>171</sup> and faster clearance of verapamil after i.v. administration; however, after oral administration women showed slower clearance than men,<sup>169</sup> which may be attributed to the lower body weight, higher activity of CYP3A4 and/or lower activity of P-gp compared with men.<sup>170,173</sup> Verapamil clearance decreases with age in women, which explains why older women show a greater antihypertensive response.<sup>174</sup> In an 18-week open study, amlodipine produced a greater BP reduction and incidence of oedema in women than in men.<sup>175</sup> However, major hypertension trials with calcium channel blockers (ALLHAT, INSIGHT, STOP-Hypertension-2, NORDIL) found no evidence for gender-specific differences in outcomes.<sup>11</sup> In a subanalysis of the HOT trial, the incidence of acute MI was significantly less in women with a lower diastolic BP target (<85 mmHg); a non-significant trend was found in men.<sup>176</sup>

### Digoxin

A *post hoc* analysis of the DIG study found that digoxin increased all-cause mortality among women, but not men, with HFrEF.<sup>177</sup> However, another retrospective analysis of the DIG trial reported a beneficial effect of digoxin on morbidity and no excess mortality in women at serum concentrations between 0.5 and 0.9 ng/mL, while at concentrations  $\geq 1.2$  ng/mL was harmful.<sup>178</sup> Thus, recommended digoxin plasma concentrations should be 0.5–0.9 ng/mL in women.<sup>179,180</sup> Similarly, the SOLVD trial enrolling patients with HFrEF did not find differences in mortality between men and women treated with digoxin.<sup>181</sup> However, in this study digoxin was not randomly assigned and women represented only 20% of the population.

The increased mortality reported in the DIG trial was related to: (i) supratherapeutic plasma levels (>2.0 ng/mL) due to the reduced Vd and slower renal clearance in women.<sup>25,179</sup> However, no sex-based differences in digoxin PK were found when actual or ideal body weight was used.<sup>182</sup> (ii) Women present fewer Na<sup>+</sup> pumps in erythrocytes and skeletal muscle than men, which may predispose to fatal arrhythmias.<sup>183</sup> (iii) Hormone replacement therapy, because a subgroup analysis of the HERS trial found a higher incidence of coronary events only in women on HRT treated with digoxin.<sup>184</sup> Thus, it was speculated that progestin inhibits P-gp increasing serum digoxin concentrations. However, in this study digoxin was not randomized and women on digoxin were sicker.

### Diuretics

Women experience more frequent electrolyte disturbances (e.g. hyponatraemia and hypokalaemia).<sup>185</sup> The C<sub>max</sub> and AUC of torasemide are 30–40% higher due to a reduced elimination in women than in men, which may explain why in the German Pharmacovigilance Project the majority of hospitalizations occurred in women.<sup>186</sup> However, no dose adjustments are recommended for torasemide.

### Ivabradine

This is a selective and specific inhibitor of the hyperpolarization-activated mixed Na<sup>+</sup>/K<sup>+</sup> inward If current, the primary modulator of the spontaneous diastolic depolarization in the sino-atrial node.<sup>187</sup> No differences in the efficacy or safety of ivabradine were observed in patients with stable angina pectoris,<sup>188–190</sup> with stable CAD and left-ventricular systolic dysfunction<sup>191</sup> or with symptomatic chronic HF, LV systolic dysfunction (LVEF  $\leq$  35%), and heart rate  $\geq$  70 bpm.<sup>192</sup>

### LCZ699 (entresto)

This angiotensin II receptor/neprilysin inhibitor results in systemic exposure to sacubitril (inactive prodrug of LBQ657), LBQ657 (neprilysin inhibitor), and valsartan (angiotensin II receptor blocker).<sup>193</sup> Pharmacokinetic parameters of LCZ699 analytes (LBQ657 and valsartan) are similar in men and women.<sup>194</sup> In patients with chronic HF (New York Heart Association class II–IV) and LVEF  $\leq$  40% (amended later to  $\leq$  35%), the PARADIGM-HF trial found that the risk reduction of death or HF hospitalizations remain consistent in both men and women.<sup>195,196</sup>

### Nitrates

The C<sub>max</sub> and AUC of isosorbide-5-mononitrate are higher in women, probably due to their lower body weight.<sup>197</sup> Thus, dosing should be based on dose/kg or titrated to the required clinical effect.

### PCSK9 inhibitors

Alirocumab and evolocumab bind selectively to proprotein convertase subtilisin/kexin type 9 (PCSK9) and prevent circulating PCSK9 from binding to the low-density lipoprotein receptor (LDLR) on the hepatocyte surface. Thus, PCSK9 inhibitors prevent PCSK9-mediated LDLR degradation leading to a reduction in serum LDL-cholesterol (LDL-C). Gender has no impact on the PK of alirocumab<sup>198</sup> and evolocumab,<sup>199</sup> and a similar reduction in LDL-C levels is observed in both men and women with primary hypercholesterolaemia and mixed dyslipidaemia.<sup>200–202</sup>

### Renin-angiotensin-aldosterone system inhibitors

Oestrogens increase angiotensinogen synthesis and angiotensin II plasma levels, but down-regulate renin, angiotensin-converting enzyme (ACE) activity and angiotensin II type-1 receptors expression, while androgens up-regulate the renin-angiotensin-aldosterone system (RAAS).<sup>203–205</sup> Thus, the premenopausal cardioprotective effects of oestrogens may result in part from RAAS inhibition.<sup>12,203</sup> No sex-differences have been described in the PK or the antihypertensive effects of ACE-inhibitors (ACEI), angiotensin receptor blockers (ARB), and aliskiren.<sup>12,19,206,207</sup> A *post hoc* analysis of an Australian trial showed a significant reduction of cardiovascular events with ACEIs in men, but not in women, despite similar reductions in BP in both sexes,<sup>208</sup> but this result has not been confirmed. Hypertensive men are treated more frequently with renin-angiotensin-aldosterone system inhibitors (RAASIs), while diuretics are more frequently prescribed in women.<sup>209</sup> The lower use of RAASIs in young women may be related to their potential teratogenic effects.<sup>210–212</sup> However, this lower use persists in women in all age groups, possibly due to the

**Table 5** Suggestions to improve our understanding of gender differences in the effects of cardiovascular drugs

1. Increase the number of women recruited in all phases of clinical trials
  - Include an adequate number of women unless adequately justified or enrol only woman when indicated
  - Limit the exclusion criteria to facilitate the extrapolation of the results to the general population
  - Gender-specific power calculations should be conducted and published
2. When designing and analysing the results of clinical trials gender-related cardiovascular endpoints should include outcomes important for women
3. Gender-specific PD/PK differences have not been investigated for many CV drugs and the clinical relevance of many gender-related differences remains unproven.
  - a. Preclinical studies should consider sex differences in expression and function of target receptors, both for efficacy and safety
  - b. Prospective clinical studies should be designed to better understand:
    - Sex differences in the pathophysiology and prevalence risk factors of CVD
    - Sex-related differences in the efficacy and safety of cardiovascular therapy and the mechanisms involved
    - The role of sex–gender on the PD/PK variations induced by pathological conditions
    - The potential interactions of CV drugs with endogenous or therapeutically supplied sex hormones
    - All this information should be correlated with the incidence of ADRs
  - c. Gender-specific analyses should be conducted and cost-effectiveness analysis should be conducted and published for both efficacy and safety.
  - d. Quality-of-life measures should be part of outcomes evaluated by gender
  - e. Reasons for nonadherence to therapy and/or interventions should be documented according to gender
4. Disseminate the results regarding significant gender differences in CV drug efficacy/safety
  - Gender differences in PK/PD of CV drugs should be part of medical education and should be presented as an intrinsic characteristic of many drugs
  - Develop educational programmes to increase awareness of sex-specific differences in PD/PK of CV drugs
  - Sex-specific dosage recommendations for CV drugs should be included on their labels
  - Provide sex-specific data on drug efficacy and safety in all guidelines on CVD
5. Gender differences in dosing, efficacy, and safety of CV drugs are the first step to design safer and more effective personalized treatments

ADR, adverse drug responses; CV, cardiovascular; CVD, cardiovascular diseases; PD, pharmacodynamics; PK, pharmacokinetics.

higher incidence of ADRs, including renal dysfunction and ACEI-induced cough.<sup>213–215</sup> This gender bias may contribute to persistent HF symptoms in women.<sup>180</sup>

Early trials (CONSENSUS-1, SAVE, SOLVD)<sup>216–218</sup> suggested that the reduction in mortality and HF hospitalization with enalapril and captopril were observed in men, but not in women, which can be explained by the small percentage of women enrolled.<sup>7</sup> However, the AIRE and HOPE trials found a significant benefit for women, especially in the secondary prevention of cardiovascular events in high-risk patients.<sup>219,220</sup> A meta-analysis of 30 studies (5399 men; 1991 women) confirmed comparable benefits of ACEI on total mortality and the combined endpoint of mortality or HF hospitalization for HF in males and females with HFrEF.<sup>221</sup> Another meta-analysis found a similar reduction in death, MI, and HF admissions in patients with LV dysfunction after MI in both genders.<sup>222</sup> However, women with asymptomatic LV dysfunction may not achieve a mortality benefit with ACEIs.<sup>167</sup> The large studies (CHARM, LIFE, ELITE, VALHEFT, VALUE, VALIANT, OPTIMAAL) showed that ARBs produced a similar reduction in mortality or HF hospitalization in women and men with HFrEF.<sup>7,19,223–230</sup> In patients with acute MI and LV dysfunction, the EPHEBUS trial showed a trend towards greater benefit for 30-days all-cause mortality in women treated with eplerenone,<sup>231</sup> but no differences were observed in the RALES trial with spironolactone.<sup>232</sup>

## Statins

Dyslipidaemia has the highest population-adjusted risk among women compared with all other known risk factors for

atherosclerotic CVD.<sup>233</sup> This greater atherosclerotic risk is typically not observed before menopause when the prevalence of hypercholesterolaemia is lower in women compared with men, even if cholesterol levels are elevated.<sup>5</sup> However, after menopause total cholesterol, LDL-C and triglyceride levels increase, while HDL-C levels decrease, so that women are at higher cardiovascular risk.<sup>234</sup> Despite this evidence, women are less likely than men to have LDL-C levels < 100 mg/dL or to receive evidence-based high-intensity statin therapy as recommended in the guidelines, although the use of statins remains low in both sexes.<sup>5,235</sup> This could reflect the perception of a lower risk of recurrent cardiovascular events in females with CVD despite they have a higher calculated cardiovascular risk than men,<sup>1–6</sup> although the risk of higher incidence of real (i.e. new-onset diabetes) or perceived ADRs could drive these differences.<sup>236–239</sup> Plasma concentrations of statins are 15–40% higher in women, but dose adjustment is unnecessary.<sup>12,240</sup>

In secondary prevention trials, statins are equally effective in women and men for reducing coronary events, strokes, and all-cause mortality with no increase in non-coronary mortality.<sup>241–244</sup> Interestingly, recent evidence confirmed their beneficial effects in primary prevention trials in women.<sup>242,243,245–249</sup> In a meta-analysis of 27 trials (174 000 participants, 47 000 women), the relative risk reductions in major coronary events, coronary revascularizations, stroke, and all-cause mortality did not differ significantly between men and women, showing that statin therapy is of similar effectiveness in both sexes.<sup>243</sup> The NICE guidelines recommended statin therapy for primary prevention in people with a predicted 10-year risk of a cardiovascular event of at least 10%<sup>250</sup> and the 2013 ACC/AHA guidelines recommended statin use in asymptomatic adults

aged 40–75 years without a history of CVD who have (i) LDL-C levels > 189 mg/dL, (ii) LDL-C levels of 70–189 mg/dL, if they also have DM (moderate-to-high dose statin use is recommended, depending on 10-year CVD event risk), or (iii) an estimated 10-year CVD event risk of  $\geq 7.5\%$ , as calculated on the pooled cohort equation risk calculator.<sup>251</sup>

Female sex and advanced age are recognized risk factors for statin-associated ADRs, i.e. muscle symptoms and new-onset diabetes.<sup>7,236,237,239,252–255</sup> The lower metabolism, body mass index, and plasma volume and the reduced muscle mass of women compared with men, predispose to statin-induced myalgias.<sup>7,236–239,252</sup> However, the risk of diabetes is low both in absolute terms and when compared with the reduction in coronary events.<sup>237,256</sup>

## Thrombolytic agents

There are no gender differences in drug PK and women with STEMI obtain a similar reduction in morbidity and mortality with fibrinolytic therapy as men. However, women have an increased risk of major bleeding and haemorrhagic stroke<sup>42,257–266</sup> probably because women enrolled in clinical trials were generally older and more often had comorbidities, i.e. they were at greater risk, which may partly explain the observed higher rates of mortality compared with men.<sup>259,260,266–273</sup> The finding that the increased risk of bleeding can only be partly reduced by adjusting the dose for body weight and renal function suggests an involvement of PD mechanisms.<sup>264,274</sup> In a pooled analysis of randomized clinical trials, women with acute ischaemic stroke appear benefit more from recombinant tissue plasminogen activator (rtPA) than men and the usual gender difference in outcome favouring men was not observed in the thrombolytic therapy group.<sup>275</sup>

## Gender differences in adverse drug reactions

Women present a greater (1.5–1.7-fold) incidence of ADRs and they tend to be more severe than in men requiring more often hospital admissions.<sup>7,23,26,36,276–282</sup> Specifically, women have a higher risk of drug-induced torsades de pointes (TdP), hepatotoxicity and skin diseases, bleeding complications with anticoagulants, platelet antiaggregants and thrombolytics, electrolyte abnormalities with diuretics, myopathy with statins and cough, and rise in creatinine with ACEIs<sup>12,17,26,36,42,44,61,185,186,237,263,276–282</sup> (Table 4). This is in line with the evidence that 8 of 10 drugs dropped out from US market between 1997 and 2000 posed greater health risks for women than for men.<sup>283</sup>

The reasons for the higher incidence of ADRs are unclear, but may result from (i) increased polypharmacy, as women consume more drugs than men, including over-the-counter medications and herbal remedies, which increases the risk of ADRs from drug–drug interactions<sup>11,36</sup>; (ii) differences in prescribing guideline-based drug therapy<sup>2</sup>; (iii) sex-related differences in PD (alterations in drug-target expression and/or in signal transduction pathways), immunological and hormonal factors.<sup>26</sup> However, sex-related differences can be explained simply because women present higher drug plasma levels than men due to lower clearance and/or smaller Vd and if doses are not corrected for body weight, women are more frequently overdosed than men.<sup>18,19</sup>

Thus, when interpreting clinical trials, it is important to analyse whether the dose was given on a mg/kg basis or the same total dose was given to all subjects irrespective of body weight.

## Drug-induced torsade de pointes

A prolonged heart-rate corrected QT interval (QTc) is a marker for an increased risk of polymorphic ventricular tachyarrhythmias, specifically TdP. Even after careful dosing based on body weight and creatinine clearance, equivalent drug plasma concentrations and men-predominance in the use of class I and III antiarrhythmics two-thirds of the TdP induced by cardiovascular or non-cardiovascular QT-prolonging drugs occurred in women.<sup>284–291</sup>

Women have longer QTc intervals and female gender is an independent risk factor for TdP, particularly when taking QT-prolonging drugs, as compared with men.<sup>286</sup> The greatest QTc prolongation is observed during menstruation and ovulatory phase of the menstrual cycle, while shorter QT intervals are observed during the luteal phase which was correlated with the increase in serum progesterone.<sup>292–295</sup> This observation and the finding that the QT shortens after puberty in men, but not in women,<sup>295</sup> suggest that sex hormones can modulate cardiac Ca<sup>2+</sup> and K<sup>+</sup> channels involved in ventricular repolarization.<sup>288,294–300</sup> Female hearts show reduced expression of several cardiac K<sup>+</sup> channel subunits (Kv1.4, HERG, minK, KChIP2, SUR2, Kir2.3, Kir6.2), L-type Ca<sup>2+</sup> channels, connexin-43 and phospholamban.<sup>294,296–298</sup> Testosterone increases the rapid (I<sub>Kr</sub>) and slow (I<sub>Ks</sub>) components of the delayed rectifier and the inward rectifier K<sup>+</sup> currents (I<sub>K1</sub>) that may account for the shorter QTc interval in men.<sup>288,294,297,299,300</sup> Progesterone decreases the L-type Ca<sup>2+</sup> current (I<sub>CaL</sub>) and I<sub>Kr</sub>.<sup>294,297,300</sup> However, in post-menopausal women HRT did not modify the QTc interval, suggesting that oestrogens and/or progesterone did not explain the gender differences in myocardial repolarization<sup>299</sup> and that other unrecognized mechanisms, may be important in determining sex-related differences in the risk of developing drug-induced QT prolongation.<sup>301</sup>

## Gender differences treatment

There are important differences in the prescription, adherence, and response to cardiovascular drugs between men and women, but translation of this information into clinical practice is slow.<sup>302,303</sup> A recent study in ~30 million American adults found that women were prescribed more medications than men but were less adherent (possibly related to the higher incidence of ADRs).<sup>1–4,10,11,21</sup> Particularly, women with CVD are less likely to receive preventive treatments or guidance and treated less aggressively with guideline-recommended medication than men at similar cardiovascular risk and are less likely to undergo cardiac procedures.<sup>1–5,10,11,304–306</sup> Women receive diuretics more often, but less nitrates, antiplatelets, lipid-modifying agents, ACEI, ARB, or beta blockers than men even after adjusting for all known variables.<sup>381,307–309</sup> Sex differences in the treatment of CVD may be related to the gender of the physician (male physicians used significantly less medications and lower doses in female patients), differences in physicians' interpretation of women's symptoms and time of treatment with respect to the progression of CVD.<sup>11,304,310</sup> Sometimes the reason is that women are older, forgetting that they live longer than men. These differences in

cardiovascular treatment and care further suggest the need for interventions tailored to address gender disparities. An evidence-based pharmacotherapy in women is therefore auspicious for women's health.

## Different gender representation in cardiovascular clinical trials

Women have been underrepresented in clinical trials, particularly in early phases, possibly due to hormonal changes during menstrual cycle and menopause, the influence of OCs and HRT on drug PK/PD, the fear related to drug administration during childbearing age or lactation, the underestimation of cardiovascular risk, the misconception of symptoms of CAD, and the lower occurrence of outcomes.<sup>1–5,8–14,26,305,311</sup> This underrepresentation has important implications. First, it is a key factor contributing to limited recognition of sex-based differences in prescription, adherence, and responses to cardiovascular drugs, thereby preventing optimization of therapy for women of all ages. Second, quite often clinical trials are not powered to draw sex-specific conclusions and *post hoc* analyses are often used or simply data obtained in men are often extrapolated to women. Because translation of evidence into clinical practice only occurs in populations adequately represented in clinical trials, current guidelines for prevention and treatment for CVD are based on trials conducted predominantly in middle-aged men.<sup>6</sup> Third, inadequate inclusion of female cells/animals in preclinical research and inadequate analysis of clinical data by sex might contribute to the lack of reproducibility of biomedical research.<sup>312</sup> Thus, gender-based analyses are essential to elucidate possible differences in cardiovascular drug efficacy and safety.

On the regulatory end, there are continued efforts by regulatory agencies to increase the enrolment of both sexes in all phases of drug development, from preclinical studies to large-scale phase III trials. The National Institutes of Health (NIH) Revitalization Act of 1993 required the inclusion of women in NIH-funded clinical research.<sup>313</sup> The guidelines for implementation, amended in 2001, required researchers to address inclusion of women in funding proposals and stated that phase III drug trials must be designed and carried out to allow for the valid analysis of differences between women and men when prior research has indicated that it may be important.<sup>314</sup> The Office of Research on Women's Health plays a critical role in funding basic and clinical research to study the role of sex and gender in health and disease and sets NIH research priorities in diseases, disorders, and conditions that primarily affect women. The Women at Heart Initiative launched by the ESC highlights the growing burden and under-appreciation of women's heart disease and promotes improved handling of women at risk of CVD in clinical practice.

Unfortunately, inclusion of women and sex-specific analysis and reporting remain low. In a Cochrane Review of 258 clinical trials, women comprised only 27% of the population. In 196 trials that included both men and women, only 33% examined outcomes by gender and in trials that performed a gender-based analysis, 20% reported significant differences in cardiovascular-related outcomes by gender.<sup>315</sup> When analysed by year of publication, before or after 1993, there was no difference in the frequency of gender-based analyses. In another

analysis of mixed-gender NHLBI-sponsored randomized controlled trials with primary outcomes of stroke, MI, or death published between 1997 and 2006 the median enrolment of women was 27% and only 13 out of 19 studies reported gender-based outcomes.<sup>311</sup> Another study analysed the current level of compliance with the NIH guidelines in 56 federally funded randomized controlled trials. The median enrolment of women in trials including both sexes was 37% and 75% of the studies did not report any outcomes by sex.<sup>316</sup> Even in recent large-scale trials with NOACs, women accounted for only 25–40% of the recruited patients.<sup>81,84,87–90</sup>

## Conclusions

The response to cardiovascular drugs may differ among women and men because of differences in body composition, PK/PD properties of some drugs and fluctuations in endogenous sex hormone levels (menstrual cycle, pregnancy), or the administration of OCs or HRT. Additionally, women present a higher incidence of ADRs and ADRs tend to be more severe in women, probably as a result of administration of fixed doses, not adapted to body weight, leading to higher plasma levels and potential over dosage as compared with men. The identification of sex differences in dosing, efficacy, and safety of cardiovascular drugs is an essential first step in personalizing treatment. Gender-specific PD/PK differences have not been investigated for many drugs and the clinical relevance of many sex-related differences remains unproven. This should stimulate basic and clinical research to better understand sex-related differences in the efficacy and safety of cardiovascular drugs and the role of sex on the PD/PK variations induced by pathological conditions. *Table 5* lists some recommendations for the design and dissemination of future CVD trials in women. Future trials should enrol an adequate number of females depending on the question being addressed and the design should include the analysis of sex-specific cardiovascular endpoints important for women. Cost-effectiveness analysis should be conducted and quality-of-life measures should be part of outcomes evaluated by gender. All this information would allow a better understanding of sex-related differences in the efficacy and safety of cardiovascular drugs and a more personalized drug selection for CVD prevention and treatment, particularly for those syndromes (i.e. diastolic dysfunction) that are more prevalent in women. Finally, sex-related differences in cardiovascular drug efficacy and safety should be part of medical education and presented as an intrinsic characteristic of the drugs on their labels. Nowadays, even among drugs with a greater than 40% difference in PK between men and women, sex-related recommendations for drug dosages are not included on their labels.<sup>25</sup> Nevertheless, the most effective strategy to minimize the higher incidence of ADR in women is the development and implementation of sex-specific pharmacological guidelines.

## Supplementary material

Supplementary material is available at *European Heart Journal–Cardiovascular Pharmacotherapy* online.

**Conflicts of interest:** none declared.



## References

- Stramba-Badiale M, Fox KM, Priori SG, Collins P, Daly C, Graham I, Jonsson B, Schenck-Gustafsson K, Tendera M. Cardiovascular diseases in women: a statement from the Policy Conference of the European Society of Cardiology. *Eur Heart J* 2006;**27**:994–1005.
- Maas AH, van der Schouw YT, Regitz-Zagrosek V, Swahn E, Appelman YE, Pasterkamp G, Ten Cate H, Nilsson PM, Huisman MV, Stam HC, Eizema K, Stramba-Badiale M. Red alert for women's heart: the urgent need for more research and knowledge on cardiovascular disease in women: proceedings of the workshop held in Brussels on gender differences in cardiovascular disease, 29 September 2010. *Eur Heart J* 2011;**32**:1362–1368.
- Mozaffarian D, Benjamin EJ, Go AS, Arnett DK, Blaha MJ, Cushman M, de Ferranti S, Després JP, Fullerton HJ, Howard VJ, Huffman MD, Judd SE, Kissela BM, Lackland DT, Lichtman JH, Lisabeth LD, Liu S, Mackey RH, Matchar DB, McGuire DK, Mohler ER, 3rd, Moy CS, Muntner P, Mussolino ME, Nasir K, Neumar RW, Nichol G, Palaniappan L, Pandey DK, Reeves MJ, Rodriguez CJ, Sorlie PD, Stein J, Towfighi A, Turan TN, Virani SS, Willey JZ, Woo D, Yeh RW, Turner MB; American Heart Association Statistics Committee and Stroke Statistics Subcommittee. Heart disease and stroke statistics—2015 update: a report from the American Heart Association. *Circulation* 2015;**131**:e29–322.
- Townsend N, Nichols M, Scarborough P, Rayner M. Cardiovascular disease in Europe—epidemiological update 2015. *Eur Heart J* 2015;**36**:2696–2705.
- García M, Mulvagh SL, Merz NB, Buring JE, Manson JE. Cardiovascular disease in women. *Clinical Perspectives. Circulation Res* 2016;**118**:1273–1293.
- Mosca L, Benjamin EJ, Berra K, Bezanson JL, Dolor RJ, Lloyd-Jones DM, Newby LK, Piña IL, Roger VL, Shaw LJ, Zhao D, Beckie TM, Bushnell C, D'armiento J, Kris-Etherton PM, Fang J, Ganiats TG, Gomes AS, Gracia CR, Haan CK, Jackson EA, Judelson DR, Kelepouris E, Lavie CJ, Moore A, Nussmeier NA, Ofili E, Oparil S, Ouyang P, Pinn VW, Sherif K, Smith SC Jr, Sopko G, Chandra-Strobos N, Urbina EM, Vaccarino V, Wenger NK. *Circulation* 2011;**123**:1243–1262.
- Regitz-Zagrosek V. Therapeutic implications of the gender-specific aspects of cardiovascular disease. *Nat Rev Drug Discov* 2006;**5**:425–438.
- Gurwitz JH, Col NF, Avorn J. The exclusion of the elderly and women from clinical trials in acute myocardial infarction. *J Am Med Assoc* 1992;**268**:1417–1422.
- Van Spall HG, Toren A, Kiss A, Fowler RA. Eligibility criteria of randomized controlled trials published in high-impact general medical journals: a systematic sampling review. *J Am Med Assoc* 2007;**297**:1233–1240.
- Kim ESH, Monon V. Status of women in cardiovascular clinical trials. *Arterioscler Thromb Vasc Biol* 2009;**29**:279–283.
- Manteuffel M, Williams S, Chen W, Verbrugge RR, Pittman DG, Steinkellner A. Influence of patient sex and gender on medication use, adherence, and prescribing alignment with guidelines. *J Womens Health (Larchmt)* 2014;**23**:112–119.
- Jochmann N, Stangl K, Garbe E, Baumann G, Stangl V. Female-specific aspects in the pharmacotherapy of chronic cardiovascular diseases. *Eur Heart J* 2005;**26**:1585–1595.
- Rosano GM, Lewis B, Agewall S, Wassmann S, Vitale C, Schmidt H, Drexel H, Patak A, Torp-Pedersen C, Kjeldsen KP, Tamargo J. Gender differences in the effect of cardiovascular drugs: a position document of the Working Group on Pharmacology and Drug Therapy of the ESC. *Eur Heart J* 2015;**36**:2677–2680.
- Kashuba AD, Nafziger AN. Physiological changes during the menstrual cycle and their effects on the pharmacokinetics and pharmacodynamics of drugs. *Clin Pharmacokinet* 1998;**34**:203–218.
- Gandhi M, Aweeka F, Greenblatt RM, Blaschke TF. Sex differences in pharmacokinetics and pharmacodynamics. *Annu Rev Pharmacol Toxicol* 2004;**44**:499–523.
- Harris RZ, Benet LZ, Schwartz JB. Gender effects in pharmacokinetics and pharmacodynamics. *Drugs* 1995;**50**:222–239.
- Meibohm B, Beierle I, Derendorf H. How important are gender differences in pharmacokinetics? *Clin Pharmacokinet* 2002;**41**:329–342.
- Soldin OP, Chung S, Mattison DR. Sex differences in drug disposition. *J Biomed Biotechnol* 2011;**2011**:187103.
- Soldin OP, Mattison DR. Sex differences in pharmacokinetics and pharmacodynamics. *Clin Pharmacokinet* 2009;**48**:143–158.
- EUGenMed Cardiovascular Clinical Study Group, Regitz-Zagrosek V, Oertelt-Prigione S, Prescott E, Franconi F, Gerds E, Foryst-Ludwig A, Maas AH, Kautzky-Willer A, Knappe-Wegner D, Kintscher U, Ladwig KH, Schenck-Gustafsson K, Stangl V. Gender in cardiovascular diseases: impact on clinical manifestations, management, and outcomes. *Eur Heart J* 2016;**37**:24–34.
- Legato M. Gender and the heart: sex-specific differences in normal anatomy and physiology. *J Gen Specif Med* 2000;**3**:15–18.
- Huxley VH. Sex and the cardiovascular system: the intriguing tale of how women and men regulate cardiovascular function differently. *Adv Physiol Educ* 2007;**31**:17–22.
- Oertelt-Prigione S, Regitz-Zagrosek V. Gender aspects in cardiovascular pharmacology. *J Cardiovasc Trans Res* 2009;**2**:258–266.
- Nicolas J-M, Espie P, Molimard M. Gender and interindividual variability in pharmacokinetics. *Drug Metabolism Rev* 2009;**41**:408–421.
- Anderson GD. Sex and racial differences in pharmacological response: where is the evidence? Pharmacogenetics, pharmacokinetics, and pharmacodynamics. *J Womens Health (Larchmt)* 2005;**14**:19–29.
- Franconi F, Campese I. Pharmacogenomics, pharmacokinetics and pharmacodynamics: interaction with biological differences between men and women. *Br J Clin Pharmacol* 2014;**171**:580–594.
- Stolarz AJ, Rusch NJ. Gender differences in cardiovascular drugs. *Cardiovasc Drug Ther* 2015;**29**:403–410.
- Freire AC, Basit AW, Choudhary R, Piong CW, Merchant HA. Does sex matter? The influence of gender on gastrointestinal physiology and drug delivery. *Int J Pharm* 2011;**415**:15–28.
- Schwartz JB. The current state of knowledge on age, sex, and their interactions on clinical pharmacology. *Clin Pharmacol Ther* 2007;**82**:87–96.
- Kimura T, Higaki K. Gastrointestinal transit and drug absorption. *Biol Pharm Bull* 2002;**25**:149–164.
- Mojaverian P, Rocci ML Jr, Conner DP, Abrams WB, Vlasses PH. Effect of food on the absorption of enteric-coated aspirin: correlation with gastric residence time. *Clin Pharmacol Ther* 1987;**41**:11–17.
- Sica DA, Wood M, Hess M. Gender and its effect in cardiovascular pharmacotherapeutics: recent considerations. *Congest Heart Fail* 2005;**11**:163–166.
- Bock KW, Schrenk D, Forster A, Griese EU, Mörike K, Brockmeier D, Eichelbaum M. The influence of environmental and genetic factors on CYP2D6, CYP1A2 and UDP-glucuronosyltransferases in man using sparteine, caffeine, and paracetamol as probes. *Pharmacogenetics* 1994;**4**:209–218.
- Hagg S, Spigset O, Dahlqvist R. Influence of gender and oral contraceptives on CYP2D6 and CYP2C19 activity in healthy volunteers. *Br J Clin Pharmacol* 2001;**51**:169–173.
- Wolbold R, Klein K, Burk O, Nüssler AK, Neuhaus P, Eichelbaum M, Schwab M, Zanger UM. Sex is a major determinant of CYP3A4 expression in human liver. *Hepatology* 2003;**38**:978–988.
- Rademaker M. Do women have more adverse drug reactions? *Am J Clin Dermatol* 2001;**2**:349–351.
- Cummins CL, Wu CY, Benet LZ. Sex-related differences in the clearance of cytochrome P450 3A4 substrates may be caused by P-glycoprotein. *Clin Pharmacol Ther* 2002;**72**:474–489.
- Cotreau MM, von Moltke LL, Greenblatt DJ. The influence of age and sex on the clearance of cytochrome P450 3A substrates. *Clin Pharmacokinet* 2005;**44**:33–60.
- Zanger UM, Schwab M. Cytochrome P450 enzymes in drug metabolism: regulation of gene expression, enzyme activities, and impact of genetic variation. *Pharmacol Ther* 2013;**138**:103–141.
- Berg UB. Differences in decline in GFR with age between males and females: reference data on clearances of inulin and PAH in potential kidney donors. *Nephrol Dial Transplant* 2006;**21**:2577–2582.
- Spoletini I, Vitale C, Malorni W, Rosano GM. Sex differences in drug effects: interaction with sex hormones in adult life. *Handb Exp Pharmacol* 2012;**214**:91–105.
- Capodanno D, Angiolillo DJ. Impact of race and gender on antithrombotic therapy. *Thromb Haemost* 2012;**104**:471–484.
- Alexander KP, Chen AY, Roe MT, Newby LK, Gibson CM, Allen-LaPointe NM, Pollack C, Gibler WB, Ohman EM, Peterson ED. Excess dosing of antiplatelet and antithrombin agents in the treatment of non-ST-segment elevation acute coronary syndromes. *JAMA* 2005;**294**:3108–3116.
- Alexander KP, Chen AY, Newby LK, Schwartz JB, Redberg RF, Hochman JS, Roe MT, Gibler WB, Ohman EM, Peterson ED. Sex differences in major bleeding with glycoprotein IIb/IIIa inhibitors: results from the CRUSADE (Can Rapid risk stratification of Unstable angina patients Suppress ADverse outcomes with Early implementation of the ACC/AHA guidelines) initiative. *Circulation* 2006;**114**:1380–1387.
- Steg PG, Huber K, Andreotti F, Arnesen H, Atar D, Badimon J, Bassand JP, De Caterina R, Eikelboom JA, Gulba D, Hamon M, Helft G, Fox KA, Kristensen SD, Rao SV, Verheugt FW, Widimsky P, Zeymer U, Collet JP. Bleeding in acute coronary syndromes and percutaneous coronary interventions: position paper by the Working Group on Thrombosis of the European Society of Cardiology. *Eur Heart J* 2011;**32**:1854–1864.
- Jick H, Slone D, Borda IT, Shapiro S. Efficacy and toxicity of heparin in relation to age and sex. *N Engl J Med* 1968;**279**:284–286.
- Cipolle R, Seifert R, Neilan B, Zask DE, Haus E. Heparin kinetics: variables related to disposition and dosage. *Clin Pharmacol Ther* 1981;**29**:387–393.
- Granger CB, Hirsch J, Califf RM, Col J, White HD, Betriu A, Woodlief LH, Lee KL, Bovill EG, Simes RJ, Topol EJ. Activated partial thromboplastin time and



- outcome after thrombolytic therapy for acute myocardial infarction. *Circulation* 1996;**93**:870–878.
49. Hirsh J, O'Donnell M, Eikelboom JW. Beyond unfractionated heparin and warfarin: current and future advances. *Circulation* 2007;**116**:552–560.
  50. Dose-ranging trial of enoxaparin for unstable angina: results of TIMI 11A. Thrombolysis in myocardial infarction 11A investigators. *J Am Coll Cardiol* 1997;**29**:1474–1482.
  51. Becker RC, Spencer FA, Gibson M, Rush JE, Sanderink G, Murphy SA, Ball SP, Antman EM; TIMI 11A Investigators. Influence of patient characteristics and renal function on factor Xa inhibition pharmacokinetics and pharmacodynamics after enoxaparin administration in non-ST-segment elevation acute coronary syndromes. *Am Heart J* 2002;**143**:753–759.
  52. Cohen M, Antman EM, Gurfinkel EP, Radley D; ESSENCE (Efficacy and Safety of Subcutaneous Enoxaparin in Non-Q-wave Coronary Events) and TIMI (Thrombolysis in Myocardial Infarction) 11B Investigators. Enoxaparin in unstable angina/non-ST-segment elevation myocardial infarction: treatment benefits in prespecified subgroups. *J Thromb Thrombolysis* 2001;**12**:199–206.
  53. Fragmin during Instability in Coronary Artery Disease (FRISC) Study Group. Low-molecular-weight heparin during instability in coronary artery disease. *Lancet* 1996;**347**:561–568.
  54. Toss H, Wallentin L, Siegbahn A. Influences of sex and smoking habits on anticoagulant activity in low-molecular-weight heparin treatment of unstable coronary artery disease. *Am Heart J* 1999;**137**:72–78.
  55. Mega JL, Morrow DA, Ostör E, Dorobantu M, Qin J, Antman EM, Braunwald E. Outcomes and optimal antithrombotic therapy in women undergoing fibrinolysis for ST-elevation myocardial infarction. *Circulation* 2007;**115**:2822–2828.
  56. Ferguson JJ, Califf RM, Antman EM, Cohen M, Grines CL, Goodman S, Kereiakes DJ, Langer A, Mahaffey KW, Nessel CC, Armstrong PW, Avezum A, Aylward P, Becker RC, Biasucci L, Borzak S, Col J, Frey MJ, Fry E, Gulba DC, Guneri S, Gurfinkel E, Harrington R, Hochman JS, Kleiman NS, Leon MB, Lopez-Sendon JL, Pepine CJ, Ruzyllo W, Steinhilb SR, Teirstein PS, Toro-Figueroa L, White H; SYNERGY Trial Investigators. Enoxaparin vs unfractionated heparin in high-risk patients with non-ST-segment elevation acute coronary syndromes managed with an intended early invasive strategy: primary results of the SYNERGY randomized trial. *JAMA* 2004;**292**:45–54.
  57. Swan SK, Hursting MJ. The pharmacokinetics and pharmacodynamics of argatroban: effects of age, gender, and hepatic or renal dysfunction. *Pharmacotherapy* 2000;**20**:318–329.
  58. Jang IK, Baron SJ, Hursting MJ, Anglade E. Argatroban therapy in women with heparin-induced thrombocytopenia. *J Womens Health (Larchmt)* 2007;**16**:895–901.
  59. Ng VG, Baumbach A, Grinfeld L, Lincoff AM, Mehran R, Stone GW, Lansky AJ. Impact of bleeding and bivalirudin therapy on mortality risk in women undergoing percutaneous coronary intervention (from the REPLACE-2, ACUITY, and HORIZONS-AMI Trials). *Am J Cardiol* 2016;**117**:186–191.
  60. Chacko M, Lincoff AM, Woltski KE, Cohen DJ, Bittl JA, Lansky AJ, Tsuchiya Y, Betriu A, Yen MH, Chew DP, Cho L, Topol EJ. Ischemic and bleeding outcomes in women treated with bivalirudin during percutaneous coronary intervention: a subgroup analysis of the Randomized Evaluation in PCI Linking Angiomax to Reduced Clinical Events (REPLACE)-2 trial. *Am Heart J* 2006;**151**:1032.e1–1037.
  61. Lansky AJ, Mehran R, Cristea E, Parise H, Feit F, Ohman EM, White HD, Alexander KP, Bertrand ME, Desmet W, Hamon M, Stone GW. Impact of gender and antithrombin strategy on early and late clinical outcomes in patients with non-ST-elevation acute coronary syndromes (from the ACUITY trial). *Am J Cardiol* 2009;**103**:1196–1203.
  62. Manoukian SV, Feit F, Mehran R, Voeltz MD, Ebrahimi R, Hamon M, Dangas GD, Lincoff AM, White HD, Moses JW, King SB 3rd, Ohman EM, Stone GW. Impact of major bleeding on 30-day mortality and clinical outcomes in patients with acute coronary syndromes: an analysis from the ACUITY Trial. *J Am Coll Cardiol* 2007;**49**:1362–1368.
  63. Madsen JK, Chevalier B, Darius H, Rutsch W, Wójcik J, Schneider S, Allikmets K. Ischaemic events and bleeding in patients undergoing percutaneous coronary intervention with concomitant bivalirudin treatment. *EuroIntervention* 2008;**3**:610–616.
  64. Shammass NW, Allie D, Hall P, Young J, Laird J, Safian R, Virmani A; APPROVE Investigators. Predictors of in-hospital and 30-day complications of peripheral vascular interventions using bivalirudin as the primary anticoagulant: results from the APPROVE Registry. *J Invasive Cardiol* 2005;**17**:356–359.
  65. Lincoff AM, Bittl JA, Harrington RA, Feit F, Kleiman NS, Jackman JD, Sarembock IJ, Cohen DJ, Spriggs D, Ebrahimi R, Keren G, Carr J, Cohen EA, Betriu A, Desmet W, Kereiakes DJ, Rutsch W, Wilcox RG, de Feyter PJ, Vahanian A, Topol EJ; REPLACE-2 Investigators. Bivalirudin and provisional glycoprotein IIb/IIIa blockade compared with heparin and planned glycoprotein IIb/IIIa blockade during percutaneous coronary intervention: REPLACE-2 randomized trial. *JAMA* 2003;**289**:853–863.
  66. Lincoff AM, Kleiman NS, Kereiakes DJ, Feit F, Bittl JA, Jackman JD, Sarembock IJ, Cohen DJ, Spriggs D, Ebrahimi R, Keren G, Carr J, Cohen EA, Desmet W, Rutsch W, Wilcox RG, de Feyter PJ, Vahanian A, Topol EJ; REPLACE-2 Investigators. Long-term efficacy of bivalirudin and provisional glycoprotein IIb/IIIa blockade vs heparin and planned glycoprotein IIb/IIIa blockade during percutaneous coronary revascularization: REPLACE-2 randomized trial. *JAMA* 2004;**292**:696–703.
  67. Roguin A, Steinberg BA, Watkins SP, Resar JR. Safety of bivalirudin during percutaneous coronary interventions in patients with abnormal renal function. *Int J Cardiovasc Intervent* 2005;**7**:88–92.
  68. Yusuf S, Mehta SR, Chrolavicius S, Afzal R, Pogue J, Granger CB, Budaj A, Peters RJ, Bassand JP, Wallentin L, Joyner C, Fox KA; Fifth Organization to Assess Strategies in Acute Ischemic Syndromes Investigators. Comparison of fondaparinux and enoxaparin in acute coronary syndromes. *N Engl J Med* 2006;**354**:1464–1476.
  69. Yusuf S, Mehta SR, Chrolavicius S, Afzal R, Pogue J, Granger CB, Budaj A, Peters RJ, Bassand JP, Wallentin L, Joyner C, Fox KA; OASIS-6 Trial Group. Effects of fondaparinux on mortality and reinfarction in patients with acute ST-segment elevation myocardial infarction: the OASIS-6 randomized trial. *J Am Med Assoc* 2006;**295**:1519–1530.
  70. Oldgren J, Wallentin L, Afzal R, Bassand JP, Budaj A, Chrolavicius S, Fox KA, Granger CB, Mehta SR, Pais P, Peters RJ, Xavier D, Zhu J, Yusuf S; OASIS-6 Investigators. Effects of fondaparinux in patients with ST-segment elevation acute myocardial infarction not receiving reperfusion treatment. *Eur Heart J* 2008;**29**:315–323.
  71. Gomberg-Maitland M, Wenger NK, Feyzi J, Lengyel M, Volgman AS, Petersen P, Frison L, Halperin JL. Anticoagulation in women with non-valvular atrial fibrillation in the stroke prevention using an oral thrombin inhibitor (SPORTIF) trials. *Eur Heart J* 2006;**27**:1947–1953.
  72. Hart RG, Pearce LA, McBride R, Rothbart RM, Asinger RW. Factors associated with ischemic stroke during aspirin therapy in atrial fibrillation: analysis of 2012 participants in the SPAF I-III clinical trials. The Stroke Prevention in Atrial Fibrillation (SPAF) Investigators. *Stroke* 1999;**30**:1223–1229.
  73. Fang MC, Singer DE, Chang Y, Hylek EM, Henault LE, Jensvold NG, Go AS. Gender differences in the risk of ischemic stroke and peripheral embolism in atrial fibrillation: the AnTicoagulation and Risk factors In Atrial fibrillation (ATRIA) study. *Circulation* 2005;**112**:1687–1691.
  74. [No authors listed]. Risk factors for stroke and efficacy of antithrombotic therapy in atrial fibrillation. Analysis of pooled data from five randomized controlled trials. *Arch Intern Med* 1994;**154**:1449–1457.
  75. van der Meer FJ, Rosendaal FR, Vandenbroucke JP, Briët E. Bleeding complications in oral anticoagulant therapy. An analysis of risk factors. *Arch Intern Med* 1993;**153**:1557–1562.
  76. Pengo V, Legnani C, Noventa F, Palareti G; ISCOAT Study Group (Italian Study on Complications of Oral Anticoagulant Therapy). Oral anticoagulant therapy in patients with nonrheumatic atrial fibrillation and risk of bleeding. A Multicenter Inception Cohort Study. *Thromb Haemost* 2001;**85**:418–422.
  77. Garcia D, Regan S, Crowther M, Hughes RA, Hylek EM. Warfarin maintenance dosing patterns in clinical practice: implications for safer anticoagulation in the elderly population. *Chest* 2005;**127**:2049–2056.
  78. Horton JD, Bushwick BM. Warfarin therapy: evolving strategies in anticoagulation. *Am Fam Physician* 1999;**59**:635–646.
  79. Kubitzka D, Becka M, Roth A, Mueck W. The influence of age and gender on the pharmacokinetics and pharmacodynamics of rivaroxaban—an oral, direct Factor Xa inhibitor. *J Clin Pharmacol* 2013;**53**:249–255.
  80. Jiang J, Hu Y, Zhang J, Yang J, Mueck W, Kubitzka D, Bauer RJ, Meng L, Hu P. Safety, pharmacokinetics and pharmacodynamics of single doses of rivaroxaban—an oral, direct Factor Xa inhibitor—in elderly Chinese subjects. *Thromb Haemost* 2010;**103**:234–241.
  81. Mega JL, Braunwald E, Wiviott SD, Bassand JP, Bhatt DL, Bode C, Burton P, Cohen M, Cook-Brun N, Fox KA, Goto S, Murphy SA, Plotnikov AN, Schneider D, Sun X, Verheugt FW, Gibson CM; ATLAS ACS 2–TIMI 51 Investigators. Rivaroxaban in patients with a recent acute coronary syndrome. *N Engl J Med* 2012;**366**:9–19.
  82. Frost CE, Song Y, Shenker A, Wang J, Barrett YC, Schuster A, Harris SI, LaCreta F. Effects of age and sex on the single dose pharmacokinetics and pharmacodynamics of apixaban. *Clin Pharmacokinet* 2015;**54**:651–662.
  83. Mendell J, Shi M. Safety, tolerability, pharmacokinetic (PK) and pharmacodynamic (PD) profiles of edoxaban in healthy post-menopausal or surgically sterile females, and healthy elderly males. *ESC Eur Heart J* 2011;**32**:461.
  84. Connolly SJ, Ezekowitz MD, Yusuf S, Eikelboom J, Oldgren J, Parekh A, Pogue J, Reilly PA, Themeles E, Varrone J, Wang S, Alings M, Xavier D, Zhu J, Diaz R, Lewis BS, Darius H, Diener HC, Joyner CD, Wallentin L; RE-LY Steering Committee and Investigators. Dabigatran versus warfarin in patients with atrial fibrillation. *N Engl J Med* 2009;**361**:1139–1151.

85. Stangier J. Clinical pharmacokinetics and pharmacodynamics of the oral direct thrombin inhibitor dabigatran etexilate. *Clin Pharmacokinet* 2008;**47**:285–295.
86. Sanford M, Plosker GL. Dabigatran etexilate. *Drugs* 2008;**68**:1699–1709.
87. Patel MR, Mahaffey KW, Garg J, Pan G, Singer DE, Hacke W, Breithardt G, Halperin JL, Hankey GJ, Piccini JP, Becker RC, Nessel CC, Paolini JF, Berkowitz SD, Fox KA, Califf RM; ROCKET AF Investigators. Rivaroxaban versus warfarin in nonvalvular atrial fibrillation. *N Engl J Med* 2011;**365**:883–891.
88. Granger CB, Alexander JH, McMurray JJ, Lopes RD, Hylek EM, Hanna M, Al-Khalidi HR, Ansell J, Atar D, Avezum A, Bahit MC, Diaz R, Easton JD, Ezekowitz JA, Flaker G, Garcia D, Geraldes M, Gersh BJ, Golitsyn S, Goto S, Hermosillo AG, Hohnloser SH, Horowitz J, Mohan P, Jansky P, Lewis BS, Lopez-Sendon JL, Pais P, Parkhomenko A, Verheugt FW, Zhu J, Wallentin L; ARISTOTLE Committees and Investigators. Apixaban versus warfarin in patients with atrial fibrillation. *N Engl J Med* 2011;**365**:981–992.
89. Connolly SJ, Eikelboom J, Joyner C, Diener HC, Hart R, Golitsyn S, Flaker G, Avezum A, Hohnloser SH, Diaz R, Talajic M, Zhu J, Pais P, Budaj A, Parkhomenko A, Jansky P, Commerford P, Tan RS, Sim KH, Lewis BS, Van Mieghem W, Lip GY, Kim JH, Lanasa-Zanetti F, Gonzalez-Hermosillo A, Dans AL, Munawar M, O'donnell M, Lawrence J, Lewis G, Afzal R, Yusuf S; AVERROES Steering Committee and Investigators. Apixaban in patients with atrial fibrillation. *N Engl J Med* 2011;**364**:806–817.
90. Giugliano RP, Ruff CT, Braunwald E, Murphy SA, Wiviott SD, Halperin JL, Waldo AL, Ezekowitz MD, Weitz JJ, Špinar J, Ruzyllo W, Ruda M, Koretsune Y, Betcher J, Shi M, Grip LT, Patel SP, Patel I, Hanyok JJ, Mercuri M, Antman EM; ENGAGE AF-TIMI 48 Investigators. Edoxaban versus warfarin in patients with atrial fibrillation. *N Engl J Med* 2013;**369**:2093–2104.
91. Vallurupalli S, Deshmukh A, Paydak H. Gender based differences in benefit from novel oral anticoagulant drugs compared to warfarin in atrial fibrillation: an analysis of published studies. *J Am Coll Cardiol* 2014;**63**:A320.
92. Vinereanu D, Stevens SR, Alexander JH, Al-Khatib SM, Avezum A, Bahit MC, Granger CB, Lopes RD, Halvorsen S, Hanna M, Husted S, Hylek EM, Mărgulescu AD, Wallentin L, Atar D. Clinical outcomes in patients with atrial fibrillation according to sex during anticoagulation with apixaban or warfarin: a secondary analysis of a randomized controlled trial. *Eur Heart J* 2015;**36**:3268–3275.
93. Dentali F, Sironi AP, Gianni M, Orlandini F, Guasti L, Grandi AM, Franchini M, Ageno W, Squizzato A. Gender difference in efficacy and safety of nonvitamin K antagonist oral anticoagulants in patients with nonvalvular atrial fibrillation or venous thromboembolism: a systematic review and a meta-analysis of the literature. *Semin Thromb Hemost* 2015;**41**:774–787.
94. Brauer KA, Homering M, Berkowitz SD. Effects of age, weight, gender and renal function in a pooled analysis of four phase III studies of rivaroxaban for prevention of venous thromboembolism after major orthopedic surgery. *Blood* 2008;**112**:436.
95. Alotaibi GS, Almodaimegh H, McMurtry MS, Wu C. Do women bleed more than men when prescribed novel oral anticoagulants for venous thromboembolism? A sex-based meta-analysis. *Thromb Res* 2013;**132**:185–189.
96. Loffredo L, Violi F, Perri L. Sex related differences in patients with acute venous thromboembolism treated with new oral anticoagulants. A meta-analysis of the interventional trials. *Int J Cardiol* 2016;**212**:255–258.
97. Panchoy SB, Sharma PS, Panchoy DS, Patel TM, Callans DJ, Marchlinski FE. Meta-analysis of gender differences in residual stroke risk and major bleeding in patients with nonvalvular atrial fibrillation treated with oral anticoagulants. *Am J Cardiol* 2014;**113**:485–490.
98. Escolar G, Bastida E, Garrido M, Rodríguez-Gómez J, Castillo R, Ordinas A. Sex-related differences in the effects of aspirin on the interaction of platelets with subendothelium. *Thromb Res* 1986;**44**:837–847.
99. Bain B, Forester T. A sex difference in the bleeding time. *Thromb Haemost* 1980;**3**:131–132.
100. Patti G, De Caterina R, Abbate R, Andreotti F, Biasucci LM, Calabrò P, Cioni G, Davi G, Di Sciascio G, Golia E, Golino P, Malatesta G, Mangiacapra F, Marcucci R, Nusca A, Parato VM, Pengo V, Prisco D, Pulcinelli F, Renda G, Ricottini E, Ruggieri B, Santilli F, Sofi F, Zimarino M; Working Group on Thrombosis of the Italian Society of Cardiology. Platelet function and long-term antiplatelet therapy in women: is there a gender-specificity? A 'state-of-the-art' paper. *Eur Heart J* 2014;**35**:2213–2223.
101. Faraday N, Goldschmidt-Clermont PJ, Bray PF. Gender differences in platelet GPIIb-IIIa activation. *Thromb Haemost* 1997;**77**:748–754.
102. Zwierzina WD, Kunz F, Kogelnig R, Herold M. Sex-related differences in platelet aggregation in native whole blood. *Thromb Res* 1987;**48**:161–171.
103. Johnson M, Ramey E, Ramwell PV. Sex and age differences in human platelet aggregation. *Nature* 1975;**253**:355–357.
104. Yee DL, Sun CW, Bergeron AL, Dong JF, Bray PF. Aggregometry detects platelet hyperreactivity in healthy individuals. *Blood* 2005;**106**:2723–2729.
105. Mikkola T, Turunen P, Avela K, Orpana A, Viinikka L, Ylikorkala O. 17 beta-estradiol stimulates prostacyclin, but not endothelin-1, production in human vascular endothelial cells. *J Clin Endocrinol Metab* 1995;**80**:1832–1836.
106. Caulin-Glaser T, García-Cardeña G, Sarrel P, Sessa WC, Bender JR. 17 beta-estradiol regulation of human endothelial cell basal nitric oxide release, independent of cytosolic Ca<sup>2+</sup> mobilization. *Circ Res* 1997;**81**:885–892.
107. Arora S, Veves A, Caballero AE, Smakowski P, LoGerfo FW. Estrogen improves endothelial function. *J Vasc Surg* 1998;**27**:1141–1146.
108. Mendelsohn ME, Karas RH. The protective effects of estrogen on the cardiovascular system. *N Engl J Med* 1999;**340**:1801–1811.
109. Pinto S, Coppo M, Paniccia R, Prisco D, Gori AM, Attanasio M, Abbate R. Sex related differences in platelet TxA2 generation. *Prostaglandins Leukot Essent Fatty Acids* 1990;**40**:217–221.
110. Ajayi AA, Mathur R, Halushka PV. Testosterone increases human platelet thromboxane A2 receptor density and aggregation responses. *Circulation* 1995;**91**:2742–2747.
111. Rossouw JE, Anderson GL, Prentice RL, LaCroix AZ, Kooperberg C, Stefanick ML, Jackson RD, Beresford SA, Howard BV, Johnson KC, Kotchen JM, Ockene J; Writing Group for the Women's Health Initiative Investigators. Risks and benefits of estrogen plus progestin in healthy postmenopausal women: principal results from the Women's Health Initiative randomized controlled trial. *JAMA* 2002;**288**:321–333.
112. Langer RD, Pradhan AD, Lewis CE, Manson JE, Rossouw JE, Hendrix SL, LaCroix AZ, Ridker PM. Baseline associations between postmenopausal hormone therapy and inflammatory, haemostatic, and lipid biomarkers of coronary heart disease. The Women's Health Initiative Observational Study. *Thromb Haemost* 2005;**93**:1108–1116.
113. Manson JE, Hsia J, Johnson KC, Rossouw JE, Assaf AR, Lasser NL, Trevisan M, Black HR, Heckbert SR, Detrano R, Strickland OL, Wong ND, Crouse JR, Stein E, Cushman M; Women's Health Initiative Investigators. Estrogen plus progestin and the risk of coronary heart disease. *N Engl J Med* 2003;**349**:523–534.
114. Patrono C, García Rodríguez LA, Landolfi R, Baigent C. Low-dose aspirin for the prevention of atherothrombosis. *N Engl J Med* 2005;**353**:2373–2383.
115. Collaboration Antithrombotic Trialists, Baigent C, Blackwell L, Collins R, Emberson J, Godwin J, Peto R, Buring J, Hennekens C, Kearney P, Meade T, Patrono C, Roncaglioni MC, Zanchetti A. Aspirin in the primary and secondary prevention of vascular disease: collaborative meta-analysis of individual participant data from randomised trials. *Lancet* 2009;**373**:1849–1860.
116. Becker DM, Segal J, Vaidya D, Yanek LR, Herrera-Galeano JE, Bray PF, Moy TF, Becker LC, Faraday N. Sex differences in platelet reactivity and response to low-dose aspirin therapy. *Jama* 2006;**295**:1420–1427.
117. Harrison MJ, Weisblatt E. A sex difference in the effect of aspirin on "spontaneous" platelet aggregation in whole blood. *Thromb Haemost* 1983;**50**:773–774.
118. Gum PA, Kottke-Marchant K, Poggio ED, Gurm H, Welsh PA, Brooks L, Sapp SK, Topol EJ. Profile and prevalence of aspirin resistance in patients with cardiovascular disease. *Am J Cardiol* 2001;**88**:230–235.
119. Cavallari LH, Helgason CM, Brace LD, Viana MA, Nutescu EA. Sex difference in the antiplatelet effect of aspirin in patients with stroke. *Ann Pharmacother* 2006;**40**:812–817.
120. Buchanan MR, Rischke JA, Butt R, Turpie AG, Hirsh J, Rosenfeld J. The sex-related differences in aspirin pharmacokinetics in rabbits and man and its relationship to antiplatelet effects. *Thromb Res* 1983;**29**:125–139.
121. Ho PC, Triggs EJ, Bourne DW, Heazlewood VJ. The effects of age and sex on the disposition of acetylsalicylic acid and its metabolites. *Br J Clin Pharmacol* 1985;**19**:675–684.
122. Miners JO, Gruginovich N, Whitehead AG, Robson RA, Birkett DJ. Influence of gender and oral contraceptive steroids on the metabolism of salicylic acid and acetylsalicylic acid. *Br J Clin Pharmacol* 1986;**22**:135–142.
123. Spranger M, Aspey BS, Harrison MJ. Sex difference in antithrombotic effect of aspirin. *Stroke* 1989;**20**:34–37.
124. Haque SF, Matsubayashi H, Izumi S, Sugi T, Arai T, Kondo A, Makino T. Sex difference in platelet aggregation detected by new aggregometry using light scattering. *Endocr J* 2001;**48**:33–41.
125. Samad Z, Boyle S, Ersboll M, Vora AN, Zhang Y, Becker RC, Williams R, Kuhn C, Ortel TL, Rogers JG, O'connor CM, Velazquez EJ, Jiang W; REMIT Investigators. Sex differences in platelet reactivity and cardiovascular and psychological response to mental stress in patients with stable ischemic heart disease: insights from the REMIT study. *J Am Coll Cardiol* 2014;**64**:1669–1678.
126. Ridker PM, Cook NR, Lee IM, Gordon D, Gaziano JM, Manson JE, Hennekens CH, Buring JE. A randomized trial of low-dose aspirin in the primary prevention of cardiovascular disease in women. *N Engl J Med* 2005;**352**:1293–1304.
127. Berger JS, Roncaglioni MC, Avanzini F, Pangrzzi I, Tognoni G, Brown DL. Aspirin for the primary prevention of cardiovascular events in women and men: a sex specific meta-analysis of randomized controlled trials. *Jama* 2006;**295**:306–313.

128. Xie M, Shan Z, Zhang Y, Chen S, Yang W, Bao W, Rong Y, Yu X, Hu FB, Liu L. Aspirin for primary prevention of cardiovascular events: meta-analysis of randomized controlled trials and subgroup analysis by sex and diabetes status. *PLoS One* 2014;**9**:e90286.
129. Antithrombotic Trialists' Collaboration. Collaborative meta-analysis of randomised trials of antiplatelet therapy for prevention of death, myocardial infarction, and stroke in high risk patients. *BMJ* 2002;**324**:71–86.
130. Yerman T, Gan WQ, Sin DD. The influence of gender on the effects of aspirin in preventing myocardial infarction. *BMC Med* 2007;**5**:29.
131. Boersma E, Harrington RA, Moliterno DJ, White H, Theroux P, Van de WF, de TA, Armstrong PW, Wallentin LC, Wilcox RG, Simes J, Califf RM, Topol EJ, Simoons ML. Platelet glycoprotein IIb/IIIa inhibitors in acute coronary syndromes: a meta-analysis of all major randomised clinical trials. *Lancet* 2002;**359**:189–198.
132. Cho L, Topol EJ, Balog C, Foody JM, Booth JE, Cabot C, Kleiman NS, Tcheng JE, Califf R, Lincoff AM. Clinical benefit of glycoprotein IIb/IIIa blockade with Abciximab is independent of gender: pooled analysis from EPIC, EPILOG and EPISTENT trials. Evaluation of 7E3 for the Prevention of Ischemic Complications. Evaluation in Percutaneous Transluminal Coronary Angioplasty to Improve Long-Term Outcome with Abciximab GP IIb/IIIa blockade. Evaluation of Platelet IIb/IIIa Inhibitor for Stent. *J Am Coll Cardiol* 2000;**36**:381–386.
133. Fernandes LS, Tcheng JE, O'shea JC, Weiner B, Lorenz TJ, Pacchiana C, Berdan LG, Maresh KJ, Joseph D, Madan M, Mann T, Kilaru R, Hochman JS, Kleiman NS; ESPRIT Investigators. Is glycoprotein IIb/IIIa antagonism as effective in women as in men following percutaneous coronary intervention? Lessons from the ESPRIT study. *J Am Coll Cardiol* 2002;**40**:1085–1091.
134. James SK, Stenestrand U, Lindbäck J, Carlsson J, Scherstén F, Nilsson T, Wallentin L, Lagerqvist B; SCAAR Study Group. Long-term safety and efficacy of drug-eluting versus bare-metal stents in Sweden. *N Engl J Med* 2009;**360**:1933–1945.
135. Dzewierz A, Siudak Z, Rakowski T, Kleczyński P, Dubiel JS, Dudek D. Early administration of abciximab reduces mortality in female patients with ST-elevation myocardial infarction undergoing primary percutaneous coronary intervention (from the EUROTRANSFER Registry). *J Thromb Thrombolysis* 2013;**36**:240–246.
136. Serebruany VL, Steinhubl SR, Berger PB, Malinin AI, Bhatt DL, Topol EJ. Variability in platelet responsiveness to clopidogrel among 544 individuals. *J Am Coll Cardiol* 2005;**45**:246–251.
137. Price MJ. Monitoring platelet function to reduce the risk of ischemic and bleeding complications. *Am J Cardiol* 2009;**103**(Suppl.):35A–39A.
138. Ferreiro JL, Angiolillo DJ. Clopidogrel response variability: current status and future directions. *Thromb Haemost* 2009;**102**:7–14.
139. Berger JS, Bhatt DL, Cannon CP, Chen Z, Jiang L, Jones JB, Mehta SR, Sabatine MS, Steinhubl SR, Topol EJ, Berger PB. The relative efficacy and safety of clopidogrel in women and men: a sex-specific collaborative meta-analysis. *Am Coll Cardiol* 2009;**54**:1935–1945.
140. Zaccardi F, Pitocco D, Willeit P, Laukkanen JA. Efficacy and safety of P2Y12 inhibitors according to diabetes, age, gender, body mass index and body weight: systematic review and meta-analyses of randomized clinical trials. *Atherosclerosis* 2015;**240**:439–445.
141. Wrishko RE, Ernest CS II, Small DS, Li YG, Weerakkody GJ, Riesmeyer JR, Macias WL, Rohatagi S, Salazar DE, Antman EM, Wiviott SD, Braunwald E, Ni L. Population pharmacokinetic analyses to evaluate the influence of intrinsic and extrinsic factors on exposure of prasugrel active metabolite in TRITON-TIMI 38. *J Clin Pharmacol* 2009;**49**:984–998.
142. Ernest CS II, Small DS, Rohatagi S, Salazar DE, Wallentin L, Winters KJ, Wrishko RE. Population pharmacokinetics and pharmacodynamics of prasugrel and clopidogrel in aspirin-treated patients with stable coronary artery disease. *J Pharmacokinetic Pharmacodyn* 2008;**35**:593–618.
143. Wiviott SD, Braunwald E, McCabe CH, Montalescot G, Ruzyllo W, Gottlieb S, Neumann FJ, Ardissino D, De Servi S, Murphy SA, Riesmeyer J, Weerakkody G, Gibson CM, Antman EM; TRITON-TIMI 38 Investigators. Prasugrel versus clopidogrel in patients with acute coronary syndromes. *N Engl J Med* 2007;**357**:2001–2015.
144. Hochholzer W, Wiviott SD, Antman EM, Contant CF, Guo J, Giugliano RP, Dalby AJ, Montalescot G, Braunwald E. Predictors of bleeding and time dependence of association of bleeding with mortality: insights from the trial to assess improvement in therapeutic outcomes by optimizing platelet inhibition with prasugrel-Thrombolysis in myocardial infarction 38 (TRITON-TIMI 38). *Circulation* 2011;**123**:2681–2689.
145. Chandrasekhar J, Baber U, Sartori S, Faggioni M, Aquino M, Kini A, Weintraub W, Rao S, Kapadia S, Weiss S, Strauss C, Toma C, Muhlestein B, DeFranco A, Efron M, Keller S, Baker B, Pocock S, Henry T, Mehran R. Sex-related differences in outcomes among men and women under 55 years of age with acute coronary syndrome undergoing percutaneous coronary intervention: Results from the PROMETHEUS Study. *Catheter Cardiovasc Interv* 2016; doi: 10.1002/ccd.26606.
146. Teng R. Ticagrelor: Pharmacokinetic, pharmacodynamic and pharmacogenetic profile: An update. *Clin Pharmacokinet* 2015;**54**:1125–1138.
147. Husted S, James SK, Bach RG, Becker RC, Budaj A, Heras M, Himmelmann A, Morrow J, Katus HA, Lassila R, Morais J, Nicolau JC, Steg PG, Storey RF, Wojdyla D, Wallentin L; PLATO study group. The efficacy of ticagrelor is maintained in women with acute coronary syndromes participating in the prospective, randomized, PLATelet inhibition and patient Outcomes (PLATO) trial. *Eur Heart J* 2014;**35**:1541–1550.
148. Wallentin L, Becker RC, Budaj A, Cannon CP, Emanuelsson H, Held C, Morrow J, Husted S, James S, Katus H, Mahaffey KW, Scirica BM, Skene A, Steg PG, Storey RF, Harrington RA, PLATO Investigators, Freij A, Thorsén M. Ticagrelor versus clopidogrel in patients with acute coronary syndromes. *N Engl J Med* 2009;**361**:1045–1057.
149. O'Donoghue ML, Bhatt DL, Stone GW, Steg PG, Gibson CM, Hamm CW, Price MJ, Prats J, Liu T, Deliangryis EN, Mahaffey KW, White HD, Harrington RA; CHAMPION PHOENIX Investigators. Efficacy and safety of cangrelor in women versus men during percutaneous coronary intervention: insights from the cangrelor versus standard therapy to achieve optimal management of platelet inhibition (CHAMPION PHOENIX) Trial. *Circulation* 2016;**133**:248–255.
150. Kam KW, Qi JS, Chen M, Wong TM. Estrogen reduces cardiac injury and expression of beta1-adrenoceptor upon ischemic insult in the rat heart. *J Pharmacol Exp Ther* 2004;**309**:8–15.
151. Thawornkaiwong A, Preamnim S, Wattanapernpool J. Upregulation of  $\beta$ 1-adrenergic receptors in ovariectomized rat hearts. *Life Sci* 2003;**72**:1813–1824.
152. Fletcher A, Beevers DG, Bulpitt C, Butler A, Coles EC, Hunt D, Munro-Faure AD, Newson RB, O'riordan PW, Petrie JC. Beta adrenoceptor blockade is associated with increased survival in male but not female hypertensive patients: a report from the DHSS Hypertension Care Computing Project (DHCCP). *J Hum Hypertens* 1988;**2**:219–227.
153. Luzier AB, Killian A, Wilton JH, Wilson MF, Forrest A, Kazierad DJ. Gender-related effects on metoprolol pharmacokinetics and pharmacodynamics in healthy volunteers. *Clin Pharmacol Ther* 1999;**66**:594–601.
154. Walle T, Byington RP, Furberg CD, McIntyre KM, Vokonas PS. Biologic determinants of propranolol disposition: results from 1308 patients in the Beta-Blocker Heart Attack Trial. *Clin Pharmacol Ther* 1985;**38**:509–518.
155. Walle T, Walle UK, Cowart TD, Conradi EC. Pathway-selective sex differences in the metabolic clearance of propranolol in human subjects. *Clin Pharmacol Ther* 1989;**46**:257–263.
156. Kendall MJ, Quarterman CP, Jack DB, Beeley L. Metoprolol pharmacokinetics and the oral contraceptive pill. *Br J Clin Pharmacol* 1982;**14**:120–122.
157. Cocco G, Chu D. The anti-ischemic effect of metoprolol in patients with chronic angina pectoris is gender-specific. *Cardiology* 2006;**106**:147–153.
158. The beta-blocker heart attack trial. beta-Blocker Heart Attack Study Group. *JAMA* 1981; **246**:2073–2074.
159. The MERIT-HF Study Group. Effect of metoprolol CR/XL in chronic heart failure: Metoprolol CR/XL Randomised Intervention Trial in Congestive Heart Failure (MERIT-HF). *Lancet* 1999;**353**:2001–2007.
160. Packer M, Coats AJ, Fowler MB, Katus HA, Krum H, Mohacs P, Rouleau JL, Tendera M, Castaigne A, Roecker EB, Schultz MK, DeMets DL; Carvedilol Prospective Randomized Cumulative Survival Study Group. Effect of carvedilol on survival in severe chronic heart failure. *N Engl J Med* 2001;**334**:1651–1658.
161. Packer M, Fowler MB, Roecker EB, Coats AJ, Katus HA, Krum H, Mohacs P, Rouleau JL, Tendera M, Staiger C, Holcslaw TL, Amann-Zalan I, DeMets DL; Carvedilol Prospective Randomized Cumulative Survival (COPERNICUS) Study Group. Effect of carvedilol on the morbidity of patients with severe chronic heart failure: results of the carvedilol prospective randomized cumulative survival (COPERNICUS) study. *Circulation* 2002;**106**:2194–2199.
162. Ghali JK, Pina IL, Gottlieb SS, Deedwania PC, Wikstrand JC. Metoprolol CR/XL in female patients with heart failure: analysis of the experience in metoprolol extended-release randomized intervention trial in heart failure (MERIT-HF). *Circulation* 2002;**105**:1585–1591.
163. Leizorovicz A, Lechat P, Cucherat M, Bugnard F. Bisoprolol for the treatment of chronic heart failure: a meta-analysis on individual data of two placebo-controlled studies—CIBIS and CIBIS II. Cardiac Insufficiency Bisoprolol Study. *Am Heart J* 2002;**143**:301–307.
164. Packer M, Bristow MR, Cohn JN, Colucci WS, Fowler MB, Gilbert EM, Shusterman NH. The effect of carvedilol on morbidity and mortality in patients with chronic heart failure. U.S. Carvedilol Heart Failure Study Group. *N Engl J Med* 1996;**334**:1349–1355.
165. Ghali JK. Sex-related differences in heart failure and beta-blockers. *Heart Fail Rev* 2004;**9**:149–159.



166. Ghali JK, Krause-Steinrauf HJ, Adams KF, Khan SS, Rosenberg YD, Yancy CW, Young JB, Goldman S, Peberdy MA, Lindenfeld J. Gender differences in advanced heart failure: insights from the BEST study. *J Am Coll Cardiol* 2003;**42**:2128–2134.
167. Shekelle PG, Rich MW, Morton SC, Atkinson CS, Tu W, Maglione M, Rhodes S, Barrett M, Fonarow GC, Greenberg B, Heidenreich PA, Knabel T, Konstam MA, Steimle A, Warner Stevenson L. Efficacy of angiotensin-converting enzyme inhibitors and betablockers in the management of left ventricular systolic dysfunction according to race, gender, and diabetic status: a meta-analysis of major clinical trials. *J Am Coll Cardiol* 2003;**41**:1529–1538.
168. Kotecha D, Manzano L, Krum H, Rosano G, Holmes J, Altman DG, Collins PD, Packer M, Wikstrand J, Coats AJ, Cleland JG, Kirchhof P, von Lueder TG, Rigby AS, Andersson B, Lip GY, van Veldhuisen DJ, Shibata MC, Wedel H, Böhm M, Flather MD; Beta-Blockers in Heart Failure Collaborative Group. Effect of age and sex on efficacy and tolerability of  $\beta$  blockers in patients with heart failure with reduced ejection fraction: individual patient data meta-analysis. *Brmj* 2016;**353**:i18.
169. Krecic-Shepard ME, Barnas CR, Slimko J, Schwartz JB. Faster clearance of sustained release verapamil in men versus women: continuing observations on sex-specific differences after oral administration of verapamil. *Clin Pharmacol Ther* 2000;**68**:286–292.
170. Kang D, Verotta D, Krecic-Shepard ME, Modi NB, Gupta SK, Schwartz JB. Population analyses of sustained-release verapamil in patients: effects of sex, race, and smoking. *Clin Pharmacol Ther* 2003;**73**:31–40.
171. Krecic-Shepard ME, Park K, Barnas C, Slimko J, Kerwin DR, Schwartz JB. Race and sex influence clearance of nifedipine: results of a population study. *Clin Pharmacol Ther* 2000;**68**:130–142.
172. Abad-Santos F, Novalbos J, Gálvez-Múgica MA, Gallego-Sandín S, Almeida S, Vallée F, García AG. Assessment of sex differences in pharmacokinetics and pharmacodynamics of amlodipine in a bioequivalence study. *Pharmacol Res* 2005;**51**:445–452.
173. Dadashzadeha S, Javadiana B, Sadeghian S. The effect of gender on the pharmacokinetics of verapamil and norverapamil in human. *Biopharm. Drug Dispos* 2006;**27**:329–334.
174. Schwartz JB. The influence of sex on pharmacokinetics. *Clin Pharmacokinet* 2003;**42**:107–121.
175. Kloner RA, Sowers JR, DiBona GF, Gaffney M, Wein M; For the Amlodipine Cardiovascular Community Trial Study Group. Sex- and age-related antihypertensive effects of amlodipine. *Am J Cardiol* 1996;**77**:713–722.
176. Kjeldsen SE, Kolloch RE, Leonetti G, Malliond J-M, Zanchetti A, Elmfeldt D, Warnold I, Hansson L; For the HOT Study Group. Influence of gender and age on the preventing cardiovascular disease by antihypertensive treatment and acetylsalicylic acid. The HOT Study. *J Hypertens* 2000;**18**:629–642.
177. Rathore SS, Wang Y, Krumholz HM. Sex-based differences in the effect of digoxin for the treatment of heart failure. *N Engl J Med* 2002;**347**:1403–1411.
178. Adams KF Jr, Patterson JH, Gattis WA, O'connor CM, Lee CR, Schwartz TA, Gheorghiane M. Relationship of serum digoxin concentration to mortality and morbidity in women in the digitalis investigation group trial: a retrospective analysis. *J Am Coll Cardiol* 2005;**46**:497–504.
179. Rathore SS, Curtis JP, Wang Y, Bristow MR, Krumholz HM. Association of serum digoxin concentration and outcomes in patients with heart failure. *Jama* 2003;**289**:871–878.
180. Yancy CW, Fonarow GC, Albert NM, Curtis AB, Stough WG, Gheorghiane M, Heywood JT, McBride ML, Mehra MR, O'connor CM, Reynolds D, Walsh MN. Influence of patient age and sex on delivery of guideline-recommended heart failure care in the outpatient cardiology practice setting: findings from improve HF. *Am Heart J* 2009;**157**:754–762.e2.
181. Domanski M, Fleg J, Bristow M, Knox S. The effect of gender on outcome in digitalis-treated heart failure patients. *J Card Fail* 2005;**11**:83–86.
182. Lee LS, Chan LN. Evaluation of a sex-based difference in the pharmacokinetics of digoxin. *Pharmacotherapy* 2006;**26**:44–50.
183. Blaustein MP, Robinson SW, Gottlieb SS, Balke CW, Hamlyn JM. Sex, digitalis, and the sodium pump. *Mol Interv* 2003;**3**:68–72.
184. Furberg CD, Vittinghoff E, Davidson M, Herrington DM, Simon JA, Wenger NK, Hulley S. Subgroup interactions in the heart and estrogen/progestin replacement study: lessons learned. *Circulation* 2002;**105**:917–922.
185. Werner U, Werner D, Heinbüchner S, Graf B, Ince H, Kische S, Thürmann P, König J, Fromm MF, Zolk O. Gender is an important determinant of the disposition of the loop diuretic torsemide. *J Clin Pharmacol* 2010;**50**:160–168.
186. Chapman MD, Hanrahan R, McEwen J, Marley JE. Hyponatremia and hypokalemia due to indapamide. *Med J Aust* 2002;**176**:219–221.
187. DiFrancesco D. The role of the funny current in pacemaker activity. *Circ Res* 2010;**106**:434–446.
188. Tardif J-C, Ford I, Bourassa MG, Fox K; INITIATIVE Investigators. Efficacy of ivabradine, a new selective I<sub>h</sub> inhibitor, compared with atenolol in patients with chronic stable angina. *Eur Heart J* 2005;**26**:2529–2536.
189. Ruzyllo W, Tendera M, Ford I, Fox KM. Antianginal efficacy and safety of ivabradine compared with amlodipine in patients with stable effort angina pectoris: a 3-month randomised, double-blind, multicentre, noninferiority trial. *Drugs* 2007;**67**:393–405.
190. Tendera M, Borer JS, Tardif JC. Efficacy of I<sub>h</sub> inhibition with ivabradine in different subpopulations with stable angina pectoris. *Cardiology* 2009;**114**:116–125.
191. Fox K, Ford I, Steg PG, Tendera M, Ferrari M; BEAUTIFUL Investigators. Ivabradine for patients with stable coronary artery disease and left-ventricular systolic dysfunction (BEAUTIFUL): a randomised, double-blind, placebo-controlled trial. *Lancet* 2008;**372**:807–816.
192. Swedberg K, Komajda M, Böhm M, Borer JS, Ford I, Dubost-Brama A, Lerebours G, Tavazzi L; SHIFT Investigators. Ivabradine and outcomes in chronic heart failure (SHIFT): a randomised placebo-controlled study. *Lancet* 2010;**376**:875–885.
193. Tamargo J. The mechanism of action of LCZ696. *Cardiac Failure Review* 2016;**2**:40–46.
194. Gan L, Langenickel T, Petruck J, Kode K, Rajman I, Chandra P, Zhou W, Rebello S, Sunkara G. Effects of age and sex on the pharmacokinetics of LCZ696, an angiotensin receptor neprilysin inhibitor. *J Clin Pharmacol* 2016;**56**:78–86.
195. McMurray JJ, Packer M, Desai AS, Gong J, Lefkowitz M, Rizkala AR, Rouleau JL, Shi VC, Solomon SD, Swedberg K, Zile MR; PARADIGM-HF Committees Investigators. Baseline characteristics and treatment of patients in Prospective comparison of ARNI with ACEI to Determine Impact on Global Mortality and morbidity in Heart Failure trial (PARADIGM-HF). *Eur J Heart Fail* 2014;**16**:817–825.
196. McMurray JJ, Packer M, Desai AS, Gong J, Lefkowitz MP, Rizkala AR, Rouleau JL, Shi VC, Solomon SD, Swedberg K, Zile MR; PARADIGM-HF Investigators and Committees. Angiotensin-neprilysin inhibition versus enalapril in heart failure. *N Engl J Med* 2014;**371**:993–1004.
197. Vree TB, Dammers E, Valducci R. Sex-related differences in the pharmacokinetics of isosorbide-5-mononitrate (60 mg) after repeated oral administration of two different original prolonged release formulations. *Int J Clin Pharmacol Ther* 2004;**42**:463–472.
198. Praluent® Summary of Product Characteristics. [www.ema.europa.eu/docs/en\\_GB/document\\_library/EPAR\\_-\\_Product\\_Information/human/003882/WC500194521.pdf](http://www.ema.europa.eu/docs/en_GB/document_library/EPAR_-_Product_Information/human/003882/WC500194521.pdf) (20 February 2017).
199. Repatha® Summary of Product Characteristics. [http://ec.europa.eu/health/documents/community-register/2015/20150717132330/anx\\_132330\\_es.pdf](http://ec.europa.eu/health/documents/community-register/2015/20150717132330/anx_132330_es.pdf) (20 February 2017).
200. Gaudet D, Watts GF, Robinson JG, Minini P, Sasiela WJ, Edelberg J, Louie MJ, Raal FJ. Effect of alirocumab on lipoprotein(a) over  $\geq 1.5$  years (from the Phase 3 ODYSSEY Program). *Am J Cardiol* 2017;**119**:40–46.
201. Raal FJ, Giugliano RP, Sabatine MS, Koren MJ, Langslet G, Bays H, Blom D, Eriksson M, Dent R, Wasserman SM, Huang F, Xue A, Albizem M, Scott R, Stein EA. Reduction in lipoprotein(a) with PCSK9 monoclonal antibody evolocumab (AMG 145): a pooled analysis of more than 1,300 patients in 4 phase II trials. *J Am Coll Cardiol* 2014;**63**:1278–1288.
202. Stein EA, Raal F. Reduction of low-density lipoprotein cholesterol by monoclonal antibody inhibition of PCSK9. *Annu Rev Med* 2014;**65**:417–431.
203. Fischer M, Baessler A, Schunkert H. Renin angiotensin system and gender differences in the cardiovascular system. *Cardiovasc Res* 2002;**53**:672–677.
204. Sullivan JC. Sex and the renin-angiotensin system: inequality between the sexes in response to ras stimulation and inhibition. *Am J Physiol Regul Integr Comp Physiol* 2008; **294**:R1220–R1226.
205. Komukai K, Mochizuki S, Yoshimura M. Gender and the renin-angiotensin-aldosterone system. *Fundam Clin Pharmacol* 2010;**24**:687–698.
206. Israili ZH. Clinical pharmacokinetics of angiotensin II (AT<sub>1</sub>) receptor blockers in hypertension. *J Hum Hypertens* 2000;**14**:73–86.
207. Jarugula V, Yeh CM, Howard D, Bush C, Keefe DL, Dole WP. Influence of body weight and gender on the pharmacokinetics, pharmacodynamics, and antihypertensive efficacy of aliskiren. *J Clin Pharmacol* 2010;**50**:1358–1366.
208. Wing LM, Reid CM, Ryan P, Beilin LJ, Brown MA, Jennings GL, Johnston CI, McNeil JJ, Macdonald GJ, Marley JE, Morgan TO, West MJ. A comparison of outcomes with angiotensin converting-enzyme inhibitors and diuretics for hypertension in the elderly. *N Engl J Med* 2003;**348**:583–592.
209. Ljungman C, Kahan T, Schiöler L, Hjerpe P, Hasselström J, Wettermark B, Boström KB, Manhem K. Gender differences in antihypertensive drug treatment: results from the Swedish Primary Care Cardiovascular Database (SPCCD). *J Am Soc Hypertens* 2014;**8**:882–890.
210. Moretti ME, Caprara D, Drehtua I, Yeung E, Cheung S, Federico L, Koren G. The fetal safety of angiotensin converting enzyme inhibitors and angiotensin II receptor blockers. *Obstet Gynecol Int* 2012;**2012**:658310.
211. Cooper WO. Clinical implications of increased congenital malformations after first trimester exposures to angiotensin-converting enzyme inhibitors. *J Cardiovasc Nurs* 2008;**23**:20–24.

212. Walfisch A, Al-Maawali A, Moretti ME, Nickel C, Koren G. Teratogenicity of angiotensin converting enzyme inhibitors or receptor blockers. *J Obstet Gynaecol* 2011;**31**:465–472.
213. Mackay FJ, Pearce GL, Mann RD. Cough and angiotensin II receptor antagonists: cause or confounding? *Br J Clin Pharmacol* 1999;**47**:111–114.
214. Os I, Bratland B, Dahlof B, Gisholt K, Syvertsen JO, Tretli S. Female sex as an important determinant of lisinopril induced-cough. *Lancet* 1992;**339**:372.
215. Strocchi E, Malini PL, Valtancoli G, Ricci C, Bassein L, Ambrosioni E. Cough during treatment with angiotensin-converting enzyme inhibitors. Analysis of predisposing factors. *Drug Invest* 1992;**4**:69–72.
216. Effects of Enalapril on Mortality in Severe Congestive Heart Failure. Results of the Cooperative North Scandinavian Enalapril Survival Study (CONSENSUS). The Consensus Trial Study Group. *N Engl J Med* 1987;**316**:1429–1435.
217. Pfeffer MA, Braunwald E, Moyé LA, Basta L, Brown EJ, Cuddy TE, Davis BR, Geltman EM, Goldman S, Flaker GC, Klein M, Lamas GA, Packer M, Rouleau JL, Rutherford J, Wertheimer JH, Hawkins CM. Effect of captopril on mortality and morbidity in patients with left ventricular dysfunction after myocardial infarction. Results of the survival and ventricular enlargement trial. The SAVE Investigators. *N Engl J Med* 1992;**327**:669–677.
218. Effect of enalapril on mortality and the development of heart failure in asymptomatic patients with reduced left ventricular ejection fractions. The SOLVD Investigators. *N Engl J Med* 1992;**327**:685–691.
219. Yusuf S, Sleight P, Pogue J, Bosch J, Davies R, Dagenais G; The Heart Outcomes Prevention Evaluation Study Investigators. Effects of an angiotensin-converting-enzyme inhibitor, ramipril, on cardiovascular events in high-risk patients. The Heart Outcomes Prevention Evaluation study Investigators. *N Engl J Med* 2000;**342**:145–153.
220. Effect of ramipril on mortality and morbidity of survivors of acute myocardial infarction with clinical evidence of heart failure. The Acute Infarction Ramipril Efficacy (AIRE) Study Investigators. *Lancet* 1993;**342**:821–828.
221. Garg R, Yusuf S. Overview of randomized trials of angiotensin-converting enzyme inhibitors on mortality and morbidity in patients with heart failure. Collaborative Group on ACE Inhibitor Trials. *JAMA* 1995;**273**:1450–1456.
222. Flather MD, Yusuf S, Kober L, Pfeffer M, Hall A, Murray G, Torp-Pedersen C, Ball S, Pogue J, Moyé L, Braunwald E; For the ACE inhibitor myocardial infarction collaborative group. Long-term ACE inhibitor therapy in patients with heart failure or left-ventricular dysfunction: a systematic overview of data from individual patients. *Lancet* 2000;**355**:1575–1581.
223. Pitt B, Segal R, Martinez FA, Meurers G, Cowley AJ, Thomas I, Deedwania PC, Ney DE, Snively DB, Chang PI. Randomised trial of losartan versus captopril in patients over 65 with heart failure (Evaluation of Losartan in the Elderly Study, ELITE). *Lancet* 1997;**349**:747–752.
224. Cohn JN, Tognoni G; Valsartan Heart Failure Trial Investigators. A randomized trial of the angiotensin-receptor blocker valsartan in chronic heart failure. *N Engl J Med* 2001;**345**:1667–1675.
225. Dahlof B, Devereux RB, Kjeldsen SE, Julius S, Beevers G, deFaire U, Fyhrquist F, Ibsen H, Kristianson K, Lederballe-Pedersen O, Lindholm LH, Nieminen MS, Omvik P, Oparil S, Wedel H; LIFE Study Group. Cardiovascular morbidity and mortality in the Losartan Intervention For Endpoint reduction in hypertension study (LIFE): a randomised trial against atenolol. *Lancet* 2002;**359**:995–1003.
226. Dickstein K, Kjekshus J; OPTIMAAL Steering Committee of the OPTIMAAL Study Group. Effects of losartan and captopril on mortality and morbidity in high-risk patients after acute myocardial infarction: the OPTIMAAL randomised trial. Optimal Trial in Myocardial Infarction with Angiotensin II Antagonist Losartan. *Lancet* 2002;**360**:752–760.
227. Pfeffer MA, McMurray JJ, Velazquez EJ, Rouleau JL, Køber L, Maggioni AP, Solomon SD, Swedberg K, Van de Werf F, White H, Leimberger JD, Henis M, Edwards S, Zelenkofske S, Sellers MA, Califf RM; Valsartan in Acute Myocardial Infarction Trial Investigators. Valsartan, captopril, or both in myocardial infarction complicated by heart failure, left ventricular dysfunction, or both. *N Engl J Med* 2003;**349**:1893–1906.
228. Pfeffer MA, Swedberg K, Granger CB, Held P, McMurray JJ, Michelson EL, Olofsson B, Ostergren J, Yusuf S, Pocock S; CHARM Investigators and Committees. Effects of candesartan on mortality and morbidity in patients with chronic heart failure: the CHARM-Overall programme. *Lancet* 2003;**362**:759–766.
229. Velazquez EJ, Pfeffer MA, McMurray JV, Maggioni AP, Rouleau JL, Van de Werf F, Kober L, White HD, Swedberg K, Leimberger JD, Gallo P, Sellers MA, Edwards S, Henis M, Califf RM; VALIANT Investigators. VALSartan In Acute myocardial iNfarcTion (VALIANT) trial: baseline characteristics in context. *Eur J Heart Fail* 2003;**5**:537–544.
230. Julius S, Kjeldsen SE, Weber M, Brunner HR, Ekman S, Hansson L, Hua T, Laragh J, McInnes GT, Mitchell L, Plat F, Schork A, Smith B, Zanchetti A; VALUE Trial Group. Outcomes in hypertensive patients at high cardiovascular risk treated with regimens based on valsartan or amlodipine: the VALUE randomised trial. *Lancet* 2004;**363**:2022–2031.
231. Pitt B, Remme W, Zannad F, Neaton J, Martinez F, Roniker B, Bittman R, Hurler S, Kleiman J, Gatlin M; Eplerenone Post-Acute Myocardial Infarction Heart Failure Efficacy and Survival Study Investigators. Eplerenone, a selective aldosterone blocker, in patients with left ventricular dysfunction after myocardial infarction. *N Engl J Med* 2003;**348**:1309–1321.
232. Pitt B, Zannad F, Remme WJ, Cody R, Castaigne A, Perez A, Palensky J, Wittes J. The effect of spironolactone in morbidity and mortality in patients with severe heart failure. *N Engl J Med* 1999;**341**:709–717.
233. Yusuf S, Hawken S, Ounpuu S, Dans T, Avezum A, Lanas F, McQueen M, Budaj A, Pais P, Varigos J, Lisheng L; INTERHEART Study Investigators. Effect of potentially modifiable risk factors associated with myocardial infarction in 52 countries (the INTERHEART study): case-control study. *Lancet* 2004;**364**:937–952.
234. Pilote L, Dasgupta K, Guru V, Humphries KH, McGrath J, Norris C, Rabi D, Tremblay J, Alamian A, Barnett T, Cox J, Ghali WA, Grace S, Hamet P, Ho T, Kirkland S, Lambert M, Libersan D, O’loughlin J, Paradis G, Petrovich M, Tagalakis V. A comprehensive view of sex-specific issues related to cardiovascular disease. *CMAJ* 2007;**176**:S1–S44.
235. Virani SS, Woodard LD, Ramsey DJ, Urech TH, Akeroyd JM, Shah T, Deswal A, Bozkurt B, Ballantyne CM, Petersen LA. Gender disparities in evidence-based statin therapy in patients with cardiovascular disease. *Am J Cardiol* 2015;**115**:21–26.
236. Culver AL, Ockene IS, Balasubramanian R, Olendzki BC, Sepavich DM, Wactawski-Wende J, Manson JE, Qiao Y, Liu S, Merriam PA, Rahilly-Tierny C, Thomas F, Berger JS, Ockene JK, Curb JD, Ma Y. Statin use and risk of diabetes mellitus in postmenopausal women in the Women’s Health Initiative. *Arch Intern Med* 2012;**172**:144–152.
237. Bang CN, Okin PM. Statin treatment, new-onset diabetes, and other adverse effects: a systematic review. *Curr Cardiol Rep* 2014;**16**:461–464.
238. Aiman U, Najmi A, Khan RA. Statin induced diabetes and its clinical implications. *J Pharmacol Pharmacother* 2014;**5**:181–185.
239. Thompson PD, Panza G, Zaleski A, Taylor B. Statin-Associated Side Effects. *J Am Coll Cardiol* 2016;**67**:2395–2410.
240. Sirtori C. The pharmacology of statins. *Pharmacol Res* 2014;**88**:3–11.
241. Cheung BM, Lauder IJ, Lau CP, Kumana CR. Meta-analysis of large randomized controlled trials to evaluate the impact of statins on cardiovascular outcomes. *Br J Clin Pharmacol* 2004;**57**:640–651.
242. Kostis WJ, Cheng JQ, Dobrzynski JM, Cabrera J, Kostis JB. Meta-analysis of statin effects in women versus men. *J Am Coll Cardiol* 2012;**59**:572–582.
243. Cholesterol Treatment Trialists’ (CTT) Collaboration, Fulcher J, O’connell R, Voysey M, Emberson J, Blackwell L, Mihaylova B, Simes J, Collins R, Kirby A, Colhoun H, Braunwald E, La Rosa J, Pedersen TR, Tonkin A, Davis B, Sleight P, Franzosi MG, Baigent C, Keech A. Efficacy and safety of LDL-lowering therapy among men and women: meta-analysis of individual data from 174,000 participants in 27 randomised trials. *Lancet* 2015;**385**:1397–1405.
244. Piepoli MF, Hoes AW, Agewall S, Albus C, Brotons C, Catapano AL, Cooney MT, Corrà U, Cosyns B, Deaton C, Graham I, Hall MS, Hobbs FD, Løchen ML, Löllgen H, Marques-Vidal P, Perk J, Prescott E, Redon J, Richter DJ, Sattar N, Smulders Y, Tiberi M, van der Worp HB, van Dis I, Verschuren WM; Authors/Task Force Members. 2016 European Guidelines on cardiovascular disease prevention in clinical practice: The Sixth Joint Task Force of the European Society of Cardiology and Other Societies on Cardiovascular Disease Prevention in Clinical Practice (constituted by representatives of 10 societies and by invited experts) Developed with the special contribution of the European Association for Cardiovascular Prevention & Rehabilitation (EACPR). *Eur Heart J* 2016;**37**:2315–2381.
245. Thavandiranathan P, Bagai A, Brookhart MA, Choudhry NK. Primary prevention of cardiovascular diseases with statin therapy: a meta-analysis of randomized controlled trials. *Arch Intern Med* 2006;**166**:2307–2313.
246. Mills EJ, Rachlis B, Wu P, Devereaux PJ, Arora P, Perri D. Primary prevention of cardiovascular mortality and events with statin treatments: a network meta-analysis involving more than 65,000 patients. *J Am Coll Cardiol* 2008;**52**:1769–1781.
247. Brugs JJ, Yetgin T, Hoeks SE, Gotto AM, Shepherd J, Westendorp RG, de Craen AJ, Knopp RH, Nakamura H, Ridker P, van Domburg R, Deckers JW. The benefits of statins in people without established cardiovascular disease but with cardiovascular risk factors: meta-analysis of randomised controlled trials. *BMJ* 2009;**338**:b2376.
248. Taylor F, Huffman MD, Macedo AF, Moore TH, Burke M, Davey Smith G, Ward K, Ebrahim S. Statins for the primary prevention of cardiovascular disease. *Cochrane Database Syst Rev* 2013;**1**:CD004816.
249. Karmali KN, Lloyd-Jones DM, Berendsen MA, Goff DC Jr, Sanghavi DM, Brown NC, Korenovska L, Huffman MD. Drugs for Primary Prevention of Atherosclerotic Cardiovascular Disease: An Overview of Systematic Reviews. *JAMA Cardiol* 2016;**1**:341–349.



250. NICE Clinical guideline [CG181]. Cardiovascular disease: risk assessment and reduction, including lipid modification. [www.nice.org.uk/guidance/cg181/evidence/lipid-modification-update-full-guideline-243786637](http://www.nice.org.uk/guidance/cg181/evidence/lipid-modification-update-full-guideline-243786637) (20 February 2017).
251. Stone NJ, Robinson JG, Lichtenstein AH, Bairey Merz CN, Blum CB, Eckel RH, Goldberg AC, Gordon D, Levy D, Lloyd-Jones DM, McBride P, Schwartz JS, Shero ST, Smith SC Jr, Watson K, Wilson PW, Eddleman KM, Jarrett NM, LaBresh K, Nevo L, Wnek J, Anderson JL, Halperin JL, Albert NM, Bozkurt B, Brindis RG, Curtis LH, DeMets D, Hochman JS, Kovacs RJ, Ohman EM, Pressler SJ, Sellke FW, Shen WK, Smith SC Jr, Tomaselli GF; American College of Cardiology/American Heart Association Task Force on Practice Guidelines. 2013 ACC/AHA guideline on the treatment of blood cholesterol to reduce atherosclerotic cardiovascular risk in adults: a report of the American College of Cardiology/American Heart Association Task Force On Practice Guidelines. *Circulation* 2014;**129**:S1–S45.
252. Schech S, Graham D, Staffa J, Andrade SE, La Grenade L, Burgess M, Blough D, Stergachis A, Chan KA, Platt R, Shatin D. Risk factors for statin-associated rhabdomyolysis. *Pharmacoepidemiol Drug Saf* 2007;**16**: 352–358.
253. Mancini GB, Tashakkor AY, Baker S, Bergeron J, Fitchett D, Frohlich J, Genest J, Gupta M, Hegele RA, Ng DS, Pearson GJ, Pope J. Diagnosis, prevention, and management of statin adverse effects and intolerance: Canadian Working Group Consensus update. *Can J Cardiol* 2013;**29**:1553–1568.
254. Stoes ES, Thompson PD, Corsini A, Vladutiu GD, Raal FJ, Ray KK, Roden M, Stein E, Tokgözoğlu L, Nordestgaard BG, Bruckert E, De Backer G, Krauss RM, Laufs U, Santos RD, Hegele RA, Hovingh GK, Leiter LA, Mach F, März W, Newman CB, Wiklund O, Jacobson TA, Catapano AL, Chapman MJ, Ginsberg, HN; European Atherosclerosis Society Consensus Panel. Statin-associated muscle symptoms: impact on statin therapy—European Atherosclerosis Society Consensus Panel Statement on Assessment, Aetiology and Management. *Eur Heart J* 2015;**36**:1012–1022.
255. Banach M, Rizzo M, Toth PP, Farnier M, Davidson MH, Al-Rasadi K, Aronow WS, Athyros V, Djuric DM, Ezhov MV, Greenfield RS, Hovingh GK, Kostner K, Serban C, Lighezan D, Fras Z, Moriarty PM, Muntner P, Goudev A, Ceska R, Nicholls SJ, Broncel M, Nikolic D, Pella D, Puri R, Rysz J, Wong ND, Bajnok L, Jones SR, Ray KK, Mikhailidis DP. Statin intolerance—an attempt at a unified definition. Position paper from an International Lipid Expert Panel. *Expert Opin Drug Saf* 2015;**14**:935–955.
256. Sattar N, Preiss D, Murray HM, Welsh P, Buckley BM, de Craen AJ, Seshasai SR, McMurray JJ, Freeman DJ, Jukema JW, Macfarlane PW, Packard CJ, Stott DJ, Westendorp RG, Shepherd J, Davis BR, Pressel SL, Marchionni R, Marfisi RM, Maggioni AP, Tavazzi L, Tognoni G, Kjekshus J, Pedersen TR, Cook TJ, Gotto AM, Clearfield MB, Downs JR, Nakamura H, Ohashi Y, Mizuno K, Ray KK, Ford I. Statins and risk of incident diabetes: a collaborative meta-analysis of randomised statin trials. *Lancet* 2010;**375**:735–742.
257. Razakjir OA, Tan HC, Yip WL, Lim YT. Predictors of bleeding complications and thrombocytopenia with the use of abciximab during percutaneous coronary intervention. *J Interv Cardiol* 2005;**18**:33–37.
258. Weaver WD, White HD, Wilcox RG, Aylward PE, Morris D, Guerci A, Ohman EM, Barbash GI, Betriu A, Sadowski Z, Topol EJ, Califf RM; For the GUSTO-I Investigators. Comparisons of characteristics and outcomes among women and men with acute myocardial infarction treated with thrombolytic therapy. GUSTO-I Investigators. *JAMA* 1996;**275**:777–782.
259. Reynolds HR, Farkouh ME, Lincoff AM, Hsu A, Swahn E, Sadowski ZP, White JA, Topol EJ, Hochman JS; Gusto V Investigators. Impact of female sex on death and bleeding after fibrinolytic treatment of myocardial infarction in GUSTO V. *Arch Intern Med* 2007;**167**:2054–2060.
260. Moen EK, Asher CR, Miller DP, Weaver WD, White HD, Califf RM, Topol EJ. Long-term follow-up of gender-specific outcomes after thrombolytic therapy for acute myocardial infarction from the GUSTO-I trial. Global Utilization of Streptokinase and Tissue plasminogen activator for Occluded coronary arteries. *J Womens Health* 1997;**6**:285–293.
261. Mehta RH, Stebbins AS, Lopes RD, Califf RM, Pieper KS, Armstrong PW, Van de Werf F, Hochman JS, White HD, Topol EJ, Alexander JH, Granger CB. Comparison of incidence of bleeding and mortality of men versus women with ST-elevation myocardial infarction treated with fibrinolysis. *Am J Cardiol* 2012;**109**:320–326.
262. Berkowitz SD, Granger CB, Pieper KS, Lee KL, Gore JM, Simoons M, Armstrong PW, Topol EJ, Califf RM. Incidence and predictors of bleeding after contemporary thrombolytic therapy for myocardial infarction. The Global Utilization of Streptokinase and Tissue plasminogen activator for Occluded coronary arteries (GUSTO) I Investigators. *Circulation* 1997;**95**:2508–2516.
263. Moscucci M, Fox KA, Cannon CP, Klein W, López-Sendón J, Montalescot G, White K, Goldberg RJ. Predictors of major bleeding in acute coronary syndromes: the Global Registry of Acute Coronary Events (GRACE). *Eur Heart J* 2003;**24**:1815–1823.
264. Van de Werf F, Barron HV, Armstrong PW, Granger CB, Bierioli S, Barbash G, Pehrsson K, Verheugt FW, Meyer J, Betriu A, Califf RM, Li X, Fox NL; ASSENT-2 Investigators. Assessment of the Safety and Efficacy of a New Thrombolytic. Incidence and predictors of bleeding events after fibrinolytic therapy with fibrin-specific agents: a comparison of TNK-tPA and rt-PA. *Eur Heart J* 2001;**22**:2253–2261.
265. White HD, Barbash GI, Modan M, Simes J, Diaz R, Hampton JR, Heikkilä J, Kristinsson A, Moulouposoulos S, Paolasso EA. After correcting for worse baseline characteristics, women treated with thrombolytic therapy for acute myocardial infarction have the same mortality and morbidity as men except for a higher incidence of hemorrhagic stroke. The Investigators of the International Tissue Plasminogen Activator/Streptokinase Mortality Study. *Circulation* 1993;**88**:2097–2103.
266. Gurwitz JH, Gore JM, Goldberg RJ, Barron HV, Breen T, Rundle AC, Sloan MA, French W, Rogers WJ. Risk for intracranial hemorrhage after tissue plasminogen activator treatment for acute myocardial infarction. Participants in the National Registry of Myocardial Infarction 2. *Ann Intern Med* 1998;**129**:597–604.
267. Fibrinolytic Therapy Trialists' (FTT) Collaborative Group. Indications for fibrinolytic therapy in suspected acute myocardial infarction: collaborative overview of early mortality and major morbidity results from all randomised trials of more than 1000 patients. *Lancet* 1994;**343**:311–322.
268. Woodfield SL, Lundergan CF, Reiner JS, Thompson MA, Rohrbeck SC, Deychak Y, Smith JO, Burton JR, McCarthy WF, Califf RM, White HD, Weaver WD, Topol EJ, Ross AM. Gender and acute myocardial infarction: is there a different response to thrombolysis? *J Am Coll Cardiol* 1997;**29**:35–42.
269. Gruppo Italiano per lo Studio Della Streptochinasi nell'Infarto Miocardico (GISSI). Effectiveness of intravenous thrombolytic treatment in acute myocardial infarction. *Lancet* 1986;**1**:397–402.
270. ISIS-2 (Second International Study of Infarct Survival) Collaborative Group. Randomised trial of intravenous streptokinase, oral aspirin, both, or neither among 17 187 cases of suspected acute myocardial infarction: ISIS-2. *Lancet* 1988;**2**:349–360.
271. Wilcox RG, von der Lippe G, Olsson CG, Jensen G, Skene AM, Hampton JR. Trial of tissue plasminogen activator for mortality reduction in acute myocardial infarction: Anglo-Scandinavian Study of Early Thrombolysis (ASSET). *Lancet* 1988;**2**:525–530.
272. The GUSTO Investigators. An international randomized trial comparing four thrombolytic strategies for acute myocardial infarction. *N Engl J Med* 1993;**329**:673–682.
273. Lee KL, Woodlief LH, Topol EJ, Weaver WD, Betriu A, Col J, Simoons M, Aylward P, Van de Werf F, Califf RM. Predictors of 30-day mortality in the era of reperfusion for acute myocardial infarction. *Circulation* 1995;**91**:1659–1668.
274. Becker RC, Hochman JS, Cannon CP, Spencer FA, Ball SP, Rizzo MJ, Antman EM. Fatal cardiac rupture among patients treated with thrombolytic agents and adjunctive thrombin antagonists: observations from the Thrombolysis and Thrombin Inhibition in Myocardial Infarction 9 Study. *J Am Coll Cardiol* 1999;**33**:479–487.
275. Kent DM, Price LL, Ringleb P, Hill MD, Selker HP. Sex-based differences in response to recombinant tissue plasminogen activator in acute ischemic stroke. A pooled analysis of randomized clinical trials. *Stroke* 2005;**36**:62–65.
276. Kando JC, Yonkers KA, Cole JO. Gender as a risk factor for adverse events to medications. *Drugs* 1995;**50**:1–6.
277. Martin RM, Biswas PN, Freemantle SN, Pearce GL, Mann RD. Age and sex distribution of suspected adverse drug reactions to newly marketed drugs in general practice in England: analysis of 48 cohort studies. *Br J Clin Pharmacol* 1998;**46**:505–511.
278. Zopf Y, Rabe C, Neubert A, Gassmann KG, Rascher W, Hahn EG, Brune K, Dormann H. Women encounter ADRs more often than do men. *Eur J Clin Pharmacol* 2008;**64**:999–1004.
279. Nicolson TJ, Mellor HR, Roberts RR. Gender differences in drug toxicity. *Trends Pharmacol Sci* 2010;**31**:108–114.
280. Tharpe N. Adverse drug reactions in women's health care. *J Midwifery Womens Health* 2011;**56**:205–213.
281. Bugiardini R, Yan AT, Yan RT, Fitchett D, Langer A, Manfrini O, Goodman SG; Canadian Acute Coronary Syndrome Registry I and II Investigators. Factors influencing underutilization of evidence-based therapies in women. *Eur Heart J* 2011;**32**:1337–1344.
282. Parekh A, Fadiran EO, Uhl K, Throckmorton DC. Adverse effects in women: implications for drug development and regulatory policies. *Expert Rev Clin Pharmacol* 2011;**4**:453–466.
283. US General Accounting Office (GAO). *Drug safety: most drugs withdrawn in recent years had greater health risks for women*. Washington, DC: GAO; 2001. [www.gao.gov/new.items/d01286r.pdf](http://www.gao.gov/new.items/d01286r.pdf) (20 February 2017).
284. Makkar RR, Fromm BS, Steinman RT, Meissner MD, Lehmann MH. Female gender as a risk factor for torsades de pointes associated with cardiovascular drugs. *JAMA* 1993;**270**:2590–2597.

285. Lehmann MH, Hardy S, Archibald D, Quart B, MacNeil DJ. Sex differences in risk of torsades de pointes with d,l-sotalol. *Circulation* 1996;**94**:2535–2541.
286. Pratt CM, Camm AJ, Cooper W, Friedman PL, MacNeil DJ, Moulton KM, Pitt B, Schwartz PJ, Veltri EP, Waldo AL; For the SWORD Investigators. Mortality in the Survival With Oral D-Sotalol (SWORD) trial: why did patients die? *Am J Cardiol* 1998;**81**:869–876.
287. Torp-Pederson C, Moller M, Bloch-Thomsen PE, Kober L, Sandoe E, Egstrup K, Agner E, Carlsen J, Videbaek J, Marchant B, Camm JA. Dofetilide in patients with congestive heart failure and left ventricular dysfunction. *N Eng J Med* 1999;**341**:857–865.
288. Drici MD, Clement N. Is gender a risk factor for adverse drug reactions? The example of drug-induced long QT syndrome. *Drug Safety* 2001;**24**:575–585.
289. Yap YG, Camm AJ. Drug induced QT prolongation and torsades de pointes. *Heart* 2003;**89**:1363–1372.
290. Peters RW, Gold MR. Influence of Gender on Arrhythmias. *Cardiol Rev* 2004;**12**:97–105.
291. Kannankeril P, Roden DM, Darbar D. Drug-induced long QT syndrome. *Pharmacol Rev* 2010;**62**:760–781.
292. Rodriguez I, Kilborn MJ, Liu XK, Pezzullo JC, Woosley RL. Drug-induced QT prolongation in women during the menstrual cycle. *JAMA* 2001;**285**:1322–1326.
293. Nakagawa M, Ooie T, Takahashi N, Taniguchi Y, Anan F, Yonemochi H, Saikawa T. Influence of menstrual cycle on QT interval dynamics. *Pacing Clin Electrophysiol* 2006;**29**:607–613.
294. Jonsson MK, Vos MA, Duker G, Demolombe S, van Veen TA. Gender disparity in cardiac electrophysiology: implications for cardiac safety pharmacology. *Pharmacol Ther* 2010;**127**:9–18.
295. Rautaharju PM, Zhou SH, Wong S, Calhoun HP, Berenson GS, Prineas R, Davignon A. Sex differences in the evolution of the electrocardiographic QT interval with age. *Can J Cardiol* 1992;**8**:690–695.
296. Liu XK, Katchman A, Drici MD, Ebert SN, Ducic I, Morad M, Woosley RL. Gender difference in the cycle length-dependent QT and potassium currents in rabbits. *J Pharmacol Exp Ther* 1998;**285**:672–679.
297. Kurokawa J, Kodama M, Clancy CE, Furukawa T. Sex hormonal regulation of cardiac ion channels in drug-induced QT syndromes. *Pharmacol Ther* 2016;**168**:23–28.
298. Gaborit N, Varro A, Le Bouter S, Szuts V, Escande D, Nattel S, Demolombe S. Gender-related differences in ion-channel and transporter subunit expression in non-diseased human hearts. *J Mol Cell Cardiol* 2010;**49**:639–646.
299. Larsen JA, Tung RH, Sadananda R, Goldberger JJ, Horvath G, Parker MA, Kadish AH. Effects of hormone replacement therapy on QT interval. *Am J Cardiol* 1998;**82**:993–995.
300. Arya A. Gender-related differences in ventricular repolarization: beyond gonadal steroids. *J Cardiovasc Electrophysiol* 2005;**16**:525–527.
301. Hreiche R, Morissette P, Turgeon J. Drug-Induced Long QT Syndrome in Women: Review of Current Evidence and Remaining Gaps. *Gen Med* 2008;**5**:124–135.
302. Institute of Medicine (US) Committee on Women's Health Research, Board on Population Health. *Women's Health Research: Progress, Pitfalls, and Promise*. Washington, DC: National Academies Press; 2010.
303. Wallach Kildemoes H, Hendriksen C, Andersen M. Drug utilization according to reason for prescribing: a pharmacoepidemiologic method based on an indication hierarchy. *Pharmacoepidemiol Drug Saf* 2012;**21**:1027–1035.
304. Chou AF, Scholle SH, Weisman CS, Bierman AS, Correa-de-Araujo R, Mosca L. Gender disparities in the quality of cardiovascular disease care in private managed care plans. *Womens Health Issues* 2007;**17**:120–130.
305. Lenzen MJ, Rosengren A, Scholte OP, Reimer WJ, Follath F, Boersma E, Simoons ML, Cleland JG, Komajda M. Management of patients with heart failure in clinical practice: differences between men and women. *Heart* 2008;**94**:e10.
306. Blomkalns AL, Chen AY, Hochman JS, Peterson ED, Trynosky K, Diercks DB, Brogan GX Jr, Boden WE, Roe MT, Ohman EM, Gibler WB, Newby LK; CRUSADE Investigators. Gender disparities in the diagnosis and treatment of non-ST-segment elevation acute coronary syndromes: largescale observations from the CRUSADE (Can Rapid Risk Stratification of Unstable Angina Patients Suppress Adverse Outcomes With Early Implementation of the American College of Cardiology/American Heart Association Guidelines) National Quality Improvement Initiative. *J Am Coll Cardiol* 2005;**45**:832–837.
307. Seeland U, Regitz-Zagrosek V. Sex and Gender Differences in Cardiovascular Drug Therapy. *Handb Exp Pharmacol* 2012;**214**:211–236.
308. Baumhake M, Muller U, Bohm M. Influence of Gender of Physicians and Patients on Guideline-Recommended Treatment of Chronic Heart Failure in a Cross-Sectional Study. *Eur J Heart Fail* 2009;**11**:299–303.
309. Enriquez JR, Pratap P, Zbilut JP, Calvin JE, Volgman AS. Women tolerate drug therapy for coronary artery disease as well as men do, but are treated less frequently with aspirin, beta-blockers, or statins. *Gen Med* 2008;**5**:53–61.
310. Schulman KA, Berlin JA, Harless W, Kerner JF, Sistrunk S, Gersh BJ, Dubé R, Taleghani CK, Burke JE, Williams S, Eisenberg JM, Escarce JJ. The effect of race and sex on physicians' recommendations for cardiac catheterization. *N Engl J Med* 1999;**340**:618–626.
311. Kim C, Carrigan TP, Menon V. Enrollment of women in National Heart, Lung, and Blood Institute-Funded cardiovascular controlled trials fails to meet current federal mandates for inclusion. *JACC* 2008;**52**:672–673.
312. Clayton JA, Collins FS. Policy: NIH to balance sex in cell and animal studied. *Nature* 2014;**509**:282–283.
313. National Institutes of Health. NIH guidelines on the inclusion of women and minorities as subjects in clinical research. *Fed Regist* 1994;**59**:14508–14513.
314. Office of Extramural Research NIH. *NIH policy and guidelines on the inclusion of women and minorities as subjects in clinical research—Amended*, October 2001. Department of Health and Human Services, National Institutes of Health. [https://grants.nih.gov/grants/funding/women\\_min/guidelines\\_amended\\_10\\_2001.htm](https://grants.nih.gov/grants/funding/women_min/guidelines_amended_10_2001.htm) (20 February 2017).
315. Johnson SM, Karvonen CA, Phelps CL, Nader S, Sanborn BM. Assessment of analysis by gender in the Cochrane reviews as related to treatment of cardiovascular disease. *J Womens Health (Larchmt)* 2003;**12**:449–457.
316. Geller SE, Koch A, Pelletieri B, Carnes M. Inclusion, analysis, and reporting of sex and race/ethnicity in clinical trials: have we made progress? *J Womens Health* 2011;**20**:215–220.
